# 1 Factors influencing the prescription of first-line treatment for type 2 diabetes 2 mellitus: a systematic review

3 \_\_\_\_\_  
4 Helena Moreira<sup>1,2\*</sup> | Fernando Moreira<sup>3</sup> | Ângelo Jesus<sup>3</sup> | Matilde Monteiro-Soares<sup>1,4,5,7</sup> | Paulo Santos<sup>1,6</sup>

- 5 1. MEDCIDS – Department of Community Medicine, Information and Health Decision Sciences, Faculty of  
6 Medicine of the University of Porto, Porto, Portugal
- 7 2. Escola Superior de Saúde, Instituto Politécnico do Porto, Porto, Portugal
- 8 3. REQUIMTE/LAQV, Escola Superior de Saúde, Instituto Politécnico do Porto, Rua Dr. António  
9 Bernardino de Almeida, 4200-072 Porto, Portugal
- 10 4. Escola Superior de Saúde da Cruz Vermelha Portuguesa – Lisboa, Lisbon, Portugal
- 11 5. CrossI&D: Lisbon Research Center, Escola Superior de Saúde da Cruz Vermelha Portuguesa – Lisboa,  
12 Lisbon, Portugal
- 13 6. RISE@CINTESIS: Center for Health Technology and Services Research, Faculty of Medicine Oporto  
14 University, Porto, Portugal

15  
16 \* Corresponding author

17 E-mail: [up201500208@edu.med.up.pt](mailto:up201500208@edu.med.up.pt)

## 19 Abstract

## 20 Introduction

21 Understanding and predicting prescription preferences for type 2 diabetes mellitus, a heterogeneous and  
22 complex condition that affects over 10% of the global adult population, can improve prescribing practices,  
23 guide policymakers in promoting evidence-based medicine, and help tailor first-line treatments to individual  
24 characteristics or specific subgroups, improving patient outcomes. This study aimed to identify factors  
25 influencing metformin prescription, the first-line therapy recommended in Western guidelines, and to assess  
26 factors leading to its avoidance and their alignment with evidence-based medicine. It also explores factors

**NOTE: This preprint reports new research that has not been certified by peer review and should not be used to guide clinical practice.**

27 associated with initial combination therapy, a newer and controversial approach compared to stepwise  
28 therapy.

29

## 30 **Methods**

31 We performed a systematic search in PubMed, Scopus and Web of Science for observational analytical  
32 studies evaluating factors associated with metformin or combination therapy initiation. Quality assessment  
33 was done using the Joanna Briggs Institute critical appraisal checklists. (PROSPERO registry number  
34 [CRD42023438313](#)).

35

## 36 **Results**

37 Thirty studies were included, evaluating 105 variables, mostly (62%) assessed in one study. The 25  
38 variables using combination therapy as outcome were mostly (72%) evaluated also in one study. Initial  
39 metformin prescription was strongly associated with the age of individuals with diabetes, glycated  
40 haemoglobin levels, body mass index, and renal complications, while combination therapy was mainly linked  
41 with glycated haemoglobin levels and comorbidities. Findings also highlighted a discrepancy between clinical  
42 practice and evidence-based recommendations. However, concerns were raised regarding both the internal  
43 and external validity of the included studies.

44

## 45 **Conclusion**

46 Our systematic review, that offers insights into real-world clinical practices, indicated that there is a  
47 misalignment between clinical practices and evidence-based recommendations supporting the need for  
48 interventions of this field.

49

## 50 **Keywords**

51 clinical decision-making, combination therapy, first line, metformin, prescribing, type 2 diabetes mellitus.

52

53

## 54 Introduction

55 More than 90% of people with diabetes have type 2 diabetes mellitus (T2DM), which is a chronic  
56 complex disease, and management requires a multifactorial approach to prevent or delay microvascular and  
57 macrovascular complications [1]. With a global prevalence of 10.5% among individuals aged 20 to 79 in  
58 2021 [2], T2DM contributes to 11.3% of deaths worldwide [3]. It has led to a 315% increase in healthcare  
59 expenditures over 15 years (2007-2021) [2], significantly burdening healthcare systems and society.

60 Several classes of antidiabetic drugs (ADs) are currently available, each with distinct profiles of  
61 effectiveness and safety [4]. The most commonly used ADs belong to seven drug groups: biguanides,  
62 sulfonylureas (SU), thiazolidinediones (TZDs), dipeptidyl peptidase-4 inhibitors (DPP4i), sodium-glucose  
63 transporter-2 inhibitors (SGLT2i), glucagon-like peptidase receptor-1 agonists (GLP1-RA) and insulins [5].  
64 Metformin (biguanide) is a unanimous recommendation as first-line in Western guidelines[4, 6, 7]. However,  
65 the American Diabetes Association (ADA) and the European Association for the Study of Diabetes (EASD)  
66 acknowledge that alternative first-line treatments may be appropriate. Specifically, SGLT2i and GLP1-RA  
67 are recommended for individuals with established cardiovascular disease, high cardiovascular risk, heart  
68 failure, or chronic kidney disease (CKD), irrespective of metformin use. Further, they also suggest initial  
69 combination therapy (i.e., starting with two or more drugs) when the glycated haemoglobin (HbA1c) is 1.5%  
70 above the target at diagnosis (i.e., >70 mmol/mol [ $>8.5\%$ ]) [4]. Therefore, with multiple therapeutic options  
71 available for treating this complex chronic disease, selecting the appropriate drug(s) can be a challenge for  
72 physicians.

73 Variation in healthcare resources and utilization raises essential questions about resource allocation  
74 quality, equity, and efficiency, with significant implications for healthcare and health policy [8]. Such  
75 variation is more likely to occur when multiple treatment options are available, leading to uncertainty about  
76 the most appropriate clinical choice, a phenomenon known as “professional uncertainty” [9]. Given that  
77 diabetes is a complex medical condition with diverse clinical manifestations and varying treatment  
78 responses, variations related to clinical conditions and individual preferences are expected. However, how  
79 much of this variation can be attributed to factors other than differences in individual health status or  
80 preferences?

81 A systematic review that approaches factors influencing first-line choice decisions in T2DM has yet to  
82 be found. Such a review would offer a more comprehensive perspective on potential factors and  
83 demonstrate the robustness of scientific evidence in this field. Further, identifying the factors can reveal  
84 possible clinical variations and lead to actions that promote more evidence-based medicine and increase  
85 equity in healthcare. Given that metformin is the recommended first-line treatment in guidelines and that  
86 combination therapy, which may include metformin, is a newer approach, this systematic review aims to  
87 summarize the key predictors for prescribing metformin or combination therapy as the first-line treatment  
88 for T2DM.

89

## 90 **Material and Methods**

91 This systematic review strictly adhered to the Preferred Reporting Items for Systematic Reviews and Meta-  
92 Analyses (PRISMA) guidelines [10] and was duly registered in the PROSPERO database in July 2023 under  
93 [CRD42023438313](https://www.crd42023438313). The protocol registered in PROSPERO outlines a more comprehensive systematic  
94 review, part of which is presented here.

95

### 96 **Search strategy**

97 A search was conducted in Medline (PubMed), Scopus and Web of Science on August 25, 2023, without  
98 language or time restrictions. With the clinical question (PECO-S) formulated, the search strategy was  
99 developed, with the Population (individuals with T2DM drug-naïve), Exposure (predictive factors),  
100 Outcome (starting metformin or combination therapy), and type of Study (observational analytical studies).  
101 The search strategy combined medical subject headings, free terms, and terms in the title/abstract, and it is  
102 available in S1, S2, and S3 Tables. Further, the references of relevant articles were manually searched for  
103 potentially eligible studies, and experts were also consulted. The grey literature was searched through  
104 ProQuest, Networked Digital Library of These and Dissertations, Eldis, and targeted websites like the  
105 World Health Organization (WHO), the United Nations, the International Diabetes Federation, the New  
106 York Academy of Medicine, and the National Institutes of Health.

107

## 108 Inclusion and exclusion criteria

109 The inclusion and exclusion criteria were selected based on the PECO-S elements, and all details are  
110 shown in Table 1.

111 Table 1: Study inclusion and exclusion criteria.

| Category         | Inclusion criteria                                                                                                                                                                         |
|------------------|--------------------------------------------------------------------------------------------------------------------------------------------------------------------------------------------|
| Study population | At least 80% adults ( $\geq 18$ years old) with T2DM and naïve to antidiabetic medications or subgroup analysis provided.                                                                  |
| Expose/Exhibit   | All factors that can influence prescribing, such as physician-related factors, patient-related factors, healthcare system-related factors, influence of pharmaceutical companies and cost. |
| Outcomes         | The choice of first-line oral antidiabetic therapy: metformin (a biguanide) or combination therapy (i.e., starting with two or more drugs simultaneously).                                 |
| Publication type | Observational analytical studies.                                                                                                                                                          |
| Category         | Exclusion criteria                                                                                                                                                                         |
| Study population | Studies on pregnant or breastfeeding women.                                                                                                                                                |

112

## 113 Study selection

114 EndNote 20® was used to manage references and identify duplicates. After that, the Rayyan QCRI [11]  
115 tool was employed to allow two researchers (MH and MF or JA) to blindly and independently select the  
116 references for this systematic review. Titles and abstracts were screened in the first stage, with any  
117 disagreements between researchers leading to studies being transferred to the second stage. In the second  
118 stage, the full text was analysed. Disagreements were resolved by consensus; a third researcher was consulted  
119 if a consensus was not reached. This procedure was done for study selection, data extraction and risk of  
120 bias analysis. The agreement proportion between the two reviewers was calculated for each stage.

121

## 122 Data extraction

123 Data were extracted by MH and confirmed by MF or JA following previously determined variables: (1)  
124 study identification (title, author(s), publication year, and country), (2) methods (sources and methods of  
125 participants selection, inclusion and exclusion criteria, sample size and its characteristics (gender and mean  
126 age), period(s) of data collection, follow-up, setting, statistical analysis methods, and potential bias), (3)  
127 outcomes analysed and their prevalence, list of variables (factors) and degree of statistical significance  
128 associated with the outcomes.

129

## 130 Risk of bias and data analysis

131 Two independent reviewers (MH and MF or JA) assessed the quality of studies using the Joanna Briggs  
132 Institute (JBI) quality assessment checklist for cross-sectional and cohort studies[12].

133 Due to the expected and observed high heterogeneity of studies, a meta-analysis was not feasible. Instead,  
134 a narrative synthesis occurred to map all predictive factors influencing metformin or combination therapy  
135 as a first-line choice. The criterion for a statistically significant association between exposure and outcomes  
136 was p-value <0.05, or a 95% confidence interval that did not include 1 in studies where the association was  
137 reported through risk measures (relative risk, odds ratio or hazard ratio).

138

## 139 Results

### 140 Study selection

141 Fig 1 presents the selection process flowchart providing the main reasons for exclusion. Initially, 1,645  
142 studies were identified, and four additional studies were found through reference reviews of the included  
143 studies. In the end, after two stages of screening studies, 30 studies were included. The proportion of  
144 agreement between the independent assessors from the first and second stages of screening studies was  
145 51.4% and 69.5%, respectively.

146

147 **Fig 1:** Flowchart of study selection

### 148 Study characteristics

149 Tables 2 and 3 presents the characteristics of the included studies. Considering the study design, 9 (30%)  
150 [13–21] were retrospective cohort studies and 21 (70%) [22–42] were cross-sectional studies. Most studies  
151 were from Europe (n=12 (40%)), North America (n = 11 (36.7%)), with only 6 (20%) being from Asia and  
152 1 (3.3%) from Australia. The number of participants varied widely, ranging from 415 to 1,136,723, with a  
153 median of 27,138.

Table 2: Characteristics of the retrospective cohort studies which were eligible for inclusion.

| Study and country                               | Participants' characteristics |          |                  | Period to identify sample | Follow-up (months) | Source of data                                                                            | Setting                                 | Antidiabetic drug studied                                                            |                                                                |
|-------------------------------------------------|-------------------------------|----------|------------------|---------------------------|--------------------|-------------------------------------------------------------------------------------------|-----------------------------------------|--------------------------------------------------------------------------------------|----------------------------------------------------------------|
|                                                 | Sample size                   | Male (%) | Mean Age (years) |                           |                    |                                                                                           |                                         | Prevalence initiation (%)                                                            |                                                                |
| <b>Retrospective cohort studies</b>             |                               |          |                  |                           |                    |                                                                                           |                                         |                                                                                      |                                                                |
| <b>Brouwer <i>et al.</i> (2012)</b> [13], US    | 1972                          | 48       | >21              | Jan 98 to Mar 09          | Vary*              | Vendor-based electronic health records (from BHCS and CCHS)                               | Primary care                            | Metf vs. SU (ref.)<br>Metf vs. TZDs (ref.)<br>Metf vs. CT (ref.)<br>SU vs. CT (ref.) | 66.63 (M)<br>10.60 (S)<br>5.22 (I)<br>13.74 (CT)               |
| <b>Zhang <i>et al.</i> (2012)</b> [14], US      | 10743                         | 45       | 61               | Jan 03 to Dec 05          | 24                 | General Electronic Healthcare's Clinical Data Services electronic medical record database | Multicentre                             | Metf                                                                                 | 64 (M)(<65years) <sup>1</sup><br>49 (M)(≥65years) <sup>1</sup> |
| <b>Sinclair <i>et al.</i> (2012)</b> [15], UK   | 9158                          | 54       | 62               | Jan 03 to Dec 05          | 24                 | International Medical Statistics (IMS) MediPlus database                                  | Information from general practitioners. | Metf                                                                                 | 76 (M) <sup>1</sup>                                            |
| <b>Raebel <i>et al.</i> (2013)</b> [16], US     | 241327                        | 53       | 59               | Jan 05 to Dec 10          | 6                  | Surveillance Prevention and Management of diabetes mellitus (SUPREME-DM)                  | Multicentre                             | SU vs. Metf (ref.)                                                                   | 19,17 (S) <sup>1</sup><br>65.53 (M) <sup>1</sup>               |
| <b>Geier <i>et al.</i> (2014)</b> [17], Germany | 27138                         | 49       | 63               | Jun 03 to Dec 09          | Vary*              | German Disease Management Program for T2DM (DMP-DM2), funding by health insurance         | Multicentre                             | Metf vs. SU (ref.)                                                                   | 33 (M) <sup>2</sup><br>7 (S) <sup>2</sup>                      |
| <b>Wright (2014)</b> [18], UK                   | 44838                         | 57       | 61               | Jan 05 to Dec 09          | Vary*              | Clinical Practice Research Datalink                                                       | Primary care                            | SU vs. Metf (ref.)                                                                   | 10.4 (S)<br>87.8 (M)                                           |
| <b>Li (2019)</b> [19], US                       | 231408                        | 38       | 72               | Jan 07 to Dec 17          | 12                 | Health insurance database (Medicare)                                                      | Multicentre                             | Metf<br>Metf vs. SU (ref.)                                                           | 68.4 (M) <sup>1</sup><br>14.8 (S) <sup>1</sup>                 |
| <b>Carrillo Balam (2020)</b> [20], Scotland     | 154660                        | 56       | 61               | Jan 04 to Dec 12          | 24                 | Scottish care information – diabetes                                                      | Multicentre                             | Metf                                                                                 | 82.3 (M)                                                       |
| <b>Ouchi <i>et al.</i> (2023)</b> [21], Spain   | 86854                         | 58       | 59               | Jan 15 to Dec 20          | Vary*              | Electronic medical records from SIDIAP                                                    | Primary care                            | MT vs. MT <sup>1</sup>                                                               | 78.3 (MT)<br>21.7 (CT)                                         |

155  
156  
157  
158  
159  
160  
161  
162  
163  
164  
165  
166

Studies are listed in chronological order, from the oldest to the most recent.

US, the United States of America; UK, the United Kingdom; BHCS, Baylor Health Care System; CCHS, Christiana Care Health System; SIDIAP, Information System for Research in Primary Care; Metf (M), metformin; SU (S), Sulfonylureas; TZDs (T), Thiazolidinediones; MT, monotherapy; CT, combination therapy which means exposure to ≥2 or more drugs, CT in Brouwer *et al.* [13] include only metformin, sulfonylureas and thiazolidinedione; vs., versus meaning that one drug was compared to another in statistical analysis; (ref.), category used as a dependent variable reference in statistical analysis;

\*Follow-up definitions: Brouwer *et al.* [13] followed patients until the first of the date of their last documented visit in the electronic health records plus 18 months or to 7 July 2009; In Geier *et al.* [17] the follow-up happened until individuals were started on antidiabetic drug therapy, death, or study end date, whichever came first; Wright [18] followed individuals from their identification (at any time during the sample identification period) until the end of the study (December 2012); Ouchi *et al.* [21] followed patients for at least 12 months or until death, or end of data availability (transferred to another database or December 2020).

<sup>1</sup>Prevalence among those who initiated therapy (not all of the sample initiated therapy). <sup>2</sup>The prevalence in Geier *et al.* [17] was calculated for the entire sample, among those who initiated therapy and those who did not.

Table 3: Characteristics of the cross-sectional studies which were eligible for inclusion.

| Study and country                                     | Participants' characteristics |          |                  | Period to identify sample | Source of data                                                                              | Setting                                      | Antidiabetic drug studied                                           |                                      |
|-------------------------------------------------------|-------------------------------|----------|------------------|---------------------------|---------------------------------------------------------------------------------------------|----------------------------------------------|---------------------------------------------------------------------|--------------------------------------|
|                                                       | Sample size                   | Male (%) | Mean Age (years) |                           |                                                                                             |                                              | Prevalence initiation (%)                                           |                                      |
| <b>Cross-sectional studies</b>                        |                               |          |                  |                           |                                                                                             |                                              |                                                                     |                                      |
| <b>Winkelmayer <i>et al.</i> (2011) [22], Austria</b> | 39077                         | 50       | 63               | Jan 06 to Jun 08          | Insurance claims data (public and non-for-profit health insurance company)                  | Multicentre                                  | Metf vs. AHA (ref.)                                                 | 71.7 (M)                             |
| <b>Desai <i>et al.</i> (2012) [23], US</b>            | 254973                        | 53       | 58               | Jan 06 to Dec 08          | Prescription claims data from CVS Caremark                                                  | Multicentre                                  | Metf<br>Metf vs MT (ref.)                                           | 51 (M)                               |
| <b>Grimes <i>et al.</i> (2014)[34], Ireland</b>       | 20947                         | 58       | >40              | Jan 08 to Dec 09          | National pharmacy claims databases in Ireland <sup>4</sup>                                  | Multicentre                                  | Metf vs. MT                                                         | 76 (M)                               |
| <b>Abdelmoneim <i>et al.</i> (2013)[36], Canada</b>   | 39276                         | NR       | ≥66              | Jan 98 to Dec 10          | Alberta Blue Cross provincial insurance program                                             | Multicentre                                  | Metf vs. SU (ref.)                                                  | 84.2 (M, 2010)<br>4.5 (S, 2010)      |
| <b>Wang <i>et al.</i> (2013)[37], Canada</b>          | 1279                          | 49       | ≥18              | Jan 03 to Dec 11          | Electronic health record (MOXXI: Medical Office of the XXIst Century)                       | Primary care                                 | SU vs. Metf* (ref.)<br>TZDs vs. Metf* (ref.)<br>Metf* vs. AHA (ref) | 92 (M*)                              |
| <b>Mitchell <i>et al.</i> (2013) [38], US</b>         | 4627                          | 48       | 53               | Jan 06 to Jun 10          | The i3 Invision Data Mart database (OptumInsight, Eden Prairie, MN, US)                     | Multicentre                                  | CT, Metf                                                            | 93.24 (MT)                           |
| <b>Vashisht <i>et al.</i> (2016)[39], US</b>          | 6121                          | 51       | NR               | NR                        | Electronic medical records from Stanford Clinical Data Warehouse                            | Hospital                                     | Glipizide vs. Metf (ref.)<br>Pioglitazone vs. Metf (ref.)           | NR                                   |
| <b>Fujihara <i>et al.</i> (2017)[40], Japan</b>       | 2666                          | 64       | 61               | Dec 09 to Mar 15          | The Japan Diabetes Clinical Data Management Study Group (JDDM)                              | Outpatient clinics (clinical diabetologists) | Metf vs. SU (ref.)                                                  | 35.7 (M)<br>11.4 (S)                 |
| <b>Tanabe <i>et al.</i> (2017)[41], Japan</b>         | 7108                          | 63       | NR               | Apr 08 to Apr 13          | Electronic information systems constructed by Medical Data Vision (MDV)                     | Multicentre                                  | SU vs. Metf                                                         | 18.4 (S)<br>26.5 (M)                 |
| <b>Liu <i>et al.</i> (2017)[42], Taiwan</b>           | 28640                         | 53       | 57               | Jan 06 to Dec 10          | Taiwan National Insurance Research Database                                                 | Multicentre                                  | AHA vs. Metf*(ref.)                                                 | 43.8 (AHA, 2006)<br>26.2 (AHA, 2010) |
| <b>Morita <i>et al.</i> (2019)[24], Japan</b>         | 224761                        | 61       | 66               | Oct 12 to Sept 16         | Medical Data Vision database, a Diagnosis Procedure Combination database                    | Outpatient                                   | DPP4i vs. Metf (ref.)                                               | 26.2 (D)<br>7.1(M)                   |
| <b>Pinto <i>et al.</i> (2019)[25], Portugal</b>       | 415                           | 55       | NR               | Jan 14 to Dec 15          | Portuguese Sentinel Practice Network                                                        | Multicentre                                  | Metf, CT.                                                           | 85.5 (M)<br>6.5 (CT)                 |
| <b>Juste <i>et al.</i> (2019)[26], Italy</b>          | 14679                         | 55       | 64               | Jan 16 to Dec 16.         | Campania Regional Database for Medication Consumption                                       | Primary care                                 | MT vs. CT                                                           | 86.9(MT)<br>13.1(CT)                 |
| <b>Moreno-Juste <i>et al.</i> [27] (2020), Spain</b>  | 4247                          | 58       | 65               | Oct 13 to Sep 14          | Electronic health records and pharmacy billing records from health system (EpiChron Cohort) | Multicentre                                  | Metf<br>MT vs. CT                                                   | 80.5 (M)<br>88.7(MT)<br>11.3 (CT)    |



Table 3 (continued)

| Study and country                                          | Participants' characteristics          |                                |                                | Period to identify sample                                | Source of data                                                                                | Setting           | Antidiabetic drug studied                                                                                           |                                                            |
|------------------------------------------------------------|----------------------------------------|--------------------------------|--------------------------------|----------------------------------------------------------|-----------------------------------------------------------------------------------------------|-------------------|---------------------------------------------------------------------------------------------------------------------|------------------------------------------------------------|
|                                                            | Sample size                            | Male (%)                       | Mean Age (years)               |                                                          |                                                                                               |                   |                                                                                                                     | Prevalence initiation (%)                                  |
| <b>Cross-sectional studies</b>                             |                                        |                                |                                |                                                          |                                                                                               |                   |                                                                                                                     |                                                            |
| <b>Yabe <i>et al.</i> (2020)</b> [28],<br><b>Japan</b>     | 1485                                   | 62                             | 60                             | Jun 16 to May 19                                         | Real-world observational study on patient outcomes in Diabetes (RESPOND)                      | Multicentre       | Metf                                                                                                                | 16 (M)                                                     |
| <b>Wood <i>et al.</i> (2020)</b><br>[29], <b>Australia</b> | 47860                                  | 53                             | 61                             | Jul 13 to Feb 18.                                        | Random sample from Australia's Pharmaceutical Benefits Scheme                                 | Multicentre       | SU vs. Metf (ref.)<br>Non-Metf vs. Metf (ref.)<br>CT vs. Metf (ref.)                                                | 85.8 (M)<br>4.6 (S)<br>1.9 (Non - M)<br>7.7 (CT)           |
| <b>Campbell <i>et al.</i>(2021)</b><br>[30], <b>Canada</b> | 17932                                  | 55                             | 56                             | Apr 12 to Mar 17                                         | Multiple administrative health datasets from Alberta, Canada                                  | Multicentre       | AHA <sup>5</sup> vs. Metf (ref.)                                                                                    | 89 (M)                                                     |
| <b>Shin <i>et al.</i> (2021)</b> [31],<br><b>US</b>        | 264542<br>(Clinf.)<br>285213<br>(Med.) | 55<br>(Clinf.)<br>46<br>(Med.) | 59<br>(Clinf.)<br>73<br>(Med.) | April 13 to Dec 19 (Clinf.)<br>April 13 to Dec 17 (Med.) | Health insurance databases (Optum Clinformatics (Clinf.) and Medicare fee-for-service (Med.)) | Multicentre       | Metf<br>Drugs without cardiovascular benefits vs. Metf (ref.)<br>Drugs With cardiovascular benefits vs. Metf (ref.) | Last data available:<br>83,1 (M, Clinf.)<br>80.6 (M, Med.) |
| <b>Bonora <i>et al.</i> (2021)</b><br>[32], <b>Italy</b>   | 65932                                  | 51                             | NR                             | Jan 18 to Dec 18                                         | Administrative data from National Health System (ARNO Diabetes Observatory database)          | Multicentre       | Metf, CT                                                                                                            | 71.9 (M)<br>3.8 (CT)                                       |
| <b>Barth <i>et al.</i> (2022)</b><br>[33], <b>Germany</b>  | 16006                                  | 57                             | 61                             | Jan 15 to Dec 20                                         | Health care database (Disease Analyzer database (IQVIA))                                      | Multicentre       | Metf                                                                                                                | 77 (M)                                                     |
| <b>Bouchi <i>et al.</i> (2022)</b> [35], <b>Japan</b>      | 1136723                                | 58                             | >20                            | Oct 14 to Mar 18                                         | National Database of health Insurance Claims and Specific Health Chek-ups in Japan            | Outpatient clinic | Metf vs. MT (ref.)                                                                                                  | 15.9 (M)                                                   |

171 Studies are listed in chronological order, from the oldest to the most recent;

172 NR, not reported; US, the United States of America; UK, the United Kingdom; <sup>4</sup>From the General Medical Services (GMS) scheme and the Long-Term Illness (LTI) scheme;

173  
174 Metf (M), metformin; Non-Metf (Non-M), non-metformin include acarbose, thiazolidinediones, dipeptidyl peptidase-4 inhibitors, glucagon-like peptidase receptor-1 agonists or sodium-glucose  
175 transporter-2 inhibitors; SU (S), Sulfonylureas; TZDs (T), Thiazolidinediones; DPP4i (D), dipeptidyl peptidase-4 inhibitors; MT, monotherapy; CT, combination therapy which means exposure to  $\geq 2$  or  
176 more drugs, CT in Brouwer *et al.* [13] include only metformin, sulfonylureas and thiazolidinedione; AHA, other oral antihyperglycemic agents (it can include monotherapy and combination therapy);  
177 Drugs without cardiovascular benefits include sulfonylureas, dipeptidyl peptidase-4 inhibitors, thiazolidinedione and others (alpha-glucosidase inhibitors, amylin mimetics, dopamine receptor agonists and  
178 meglitinides); Drugs with cardiovascular benefits include sodium-glucose cotransporte-2 inhibitors and glucagon-like peptide-1; vs., versus meaning that one drug was compared to another in statistical  
179 analysis; (ref.), category used as a dependent variable reference in statistical analysis; \*alone or in combination therapy; <sup>5</sup>It included metformin in combination therapy;

Twenty studies employed data from multicentre settings [14, 16, 17, 19, 20, 22, 23, 25, 27–34, 36, 38, 41, 42] and six studies from primary care or general practitioners [13, 15, 18, 21, 26, 37]. All studies relied on secondary data, defined as data collected by others for purposes different from the objectives of the research, such as medical records and healthcare billing files[43].

Twenty-eight studies [13–20, 22–25, 27–42] explored factors associated with metformin initiation. Nineteen [13, 16–19, 22–24, 29–31, 34–37, 39–42] of these studies employed statistical models that examined factors linked to metformin initiation in direct comparison to initiation of other antidiabetic drug(s). Sulfonylureas group were the most frequently compared drugs, accounting for 36.7% (n=11) of these studies [13, 16–19, 29, 36, 37, 39–41]. Eight studies [13, 21, 25–27, 29, 32, 38] examined factors influencing combination therapy initiation, and 6 studies [13, 25, 27, 29, 32, 38] analysed metformin and combination therapy in the same study.

## Data extracted and analysed

The 105 variables extracted from the thirty studies are categorized into four main groups of factors: physician (Table 4), healthcare system (Table 5), patient (Tables 6, 7 and 8), and disease factors (Table 9). The most extensive group of factors belongs to patient factors, with five subgroups of factors recognised: sociodemographic, lifestyle and metabolic, cardiovascular, renal and other clinical factors. Sixty-five variables (62%) were evaluated by one study, and 11 (10,5%) were assessed by five or more studies.

It is also important to highlight that one study [31] showed data analysis not as a single block, but for different periods and two databases, and another [42] employed two statistical analyses: multivariable logistic regression and multilevel linear model.

Table 4: Strength of association between physician-related factors with the outcomes.

| Physician-related factors              | Outcomes |                  |         |                                                                 |        |  |
|----------------------------------------|----------|------------------|---------|-----------------------------------------------------------------|--------|--|
|                                        | Metf.    | W/CVB            | WCVB    | AHA                                                             | CT     |  |
| Age (cat.)                             |          |                  |         | +++ [22]<br>++ [42]                                             |        |  |
| Years of experience (cont.)            |          |                  |         | - - [37]                                                        |        |  |
| Gender                                 |          |                  |         | ++ [42] <sup>LR</sup><br>- - [22]<br>- - [37][42] <sup>ML</sup> |        |  |
| Medicine evidence questionnaire (cat.) |          |                  |         | - - [37]                                                        |        |  |
| Physician Speciality                   |          | ++ [31]          | ++ [31] | +++ [22]<br>++ [42][30]                                         | + [25] |  |
|                                        |          | + [28]<br>- [25] |         |                                                                 |        |  |

+++ , variable with statistically significant association with the outcome in both univariable and multivariable analyses; ++ , variable with statistically significant association with the outcome only in multivariable analysis; + , variable with statistically significant association with the outcome only in univariable analysis; - - - , variable with no statistically significant association with the outcome in both univariable and multivariable analyses; - - , variable with no statistically significant association with the outcome in multivariable analyses - , variable with no statistically significant association with the outcome only in univariable analysis;

Metf., metformin; W/CVB, drugs without cardiovascular benefits (sulfonylureas, dipeptidyl peptidase-4 inhibitor, thiazolidinediones,  $\alpha$ -glucosidase inhibitors, amylin mimetics agents, dopamine receptor agonists, and meglitinides); WCVB, drugs with cardiovascular benefits (Sodium glucose cotransporter 2 inhibitors, glucagon-like peptide-1 receptor agonists); AHA, other antidiabetic agents can include monotherapy or combination therapy; CT, combination therapy; cont., continuous; cat., categorical;

Statistical analysis used: <sup>LR</sup>Data from logistic regression [42], <sup>ML</sup>Data from multilevel model [42];

Table 5: Strength of association between healthcare system-related factors with outcomes.

| Healthcare system-related factors | Outcomes |                                                                |                                  |                                                      |                                                         |                                                   |                                                 |  |
|-----------------------------------|----------|----------------------------------------------------------------|----------------------------------|------------------------------------------------------|---------------------------------------------------------|---------------------------------------------------|-------------------------------------------------|--|
|                                   | Metf.    | SU                                                             | DPP4i                            | W/CVB                                                | WCVB                                                    | MT                                                | AHA                                             |  |
| Guidelines (updates)              | Metf.    | - [-37]                                                        |                                  |                                                      |                                                         |                                                   | ++ [37]                                         |  |
|                                   | TZDs     | ++[37]                                                         |                                  |                                                      |                                                         |                                                   |                                                 |  |
| Time (cont.)                      | Metf.    |                                                                | ++[36]                           |                                                      |                                                         | ++ [23]                                           |                                                 |  |
|                                   | ————     | + <sup>[19]</sup> [23][31] <sup>1</sup><br>- [31] <sup>2</sup> |                                  |                                                      |                                                         |                                                   |                                                 |  |
| Time (cat.)                       | Metf.    |                                                                | +++[16]<br>++[17][29]<br>- [-13] |                                                      |                                                         | ++[29][35]                                        | +++[22]<br>++ [42]                              |  |
|                                   | TZDs     | ++[13]                                                         |                                  |                                                      |                                                         |                                                   |                                                 |  |
|                                   | CT       | ++[29]<br>- [-13]                                              | - [-13]                          |                                                      |                                                         |                                                   |                                                 |  |
| HbA1c tests (cat.)                | Metf.    |                                                                |                                  | ++[31]                                               | ++[31]                                                  |                                                   |                                                 |  |
| Office visits (cont.)             | Metf.    |                                                                | +++[36]                          | + [24]                                               | - [-31]                                                 | ++[31] <sup>ALX</sup><br>- [-31] <sup>2(TB)</sup> |                                                 |  |
| Hospitalisation (cont.)           | Metf.    |                                                                | + [36]<br>- [-36]                |                                                      |                                                         |                                                   |                                                 |  |
| Hospitalisation (cat.)            | Metf.    |                                                                | ++[19]                           | ++[31]                                               | ++[31] <sup>ALX</sup><br>- [-31] <sup>1(TB),2(TB)</sup> |                                                   |                                                 |  |
| Length of hospital stay (cont.)   | Metf.    |                                                                |                                  | ++[31] <sup>2(TB,TC)</sup><br>- [-31] <sup>ALX</sup> | ++[31] <sup>2(TA)</sup><br>- [-31] <sup>ALX</sup>       |                                                   |                                                 |  |
| Length of hospital stay (cat.)    | Metf.    |                                                                |                                  |                                                      |                                                         |                                                   | +++ [22]                                        |  |
| Emergency visits (cont.)          | Metf.    |                                                                | + [36]<br>- [-36]                |                                                      |                                                         |                                                   |                                                 |  |
| Emergency visits (cat.)           | Metf.    |                                                                |                                  | - [-31]                                              | ++[31] <sup>ALX</sup><br>- [-31] <sup>1(TA)</sup>       |                                                   |                                                 |  |
| Preventive healthcare service     | Metf.    |                                                                |                                  | ++[31]                                               | ++[31] <sup>2(TC)</sup><br>- [-31] <sup>ALX</sup>       |                                                   |                                                 |  |
| Healthcare settings               | Metf.    |                                                                |                                  |                                                      |                                                         | ++ [35]                                           | +++ [42] <sup>LR</sup><br>- [-42] <sup>ML</sup> |  |
| Healthcare ownership              | Metf.    |                                                                |                                  |                                                      |                                                         |                                                   | ++ [42]                                         |  |
| Location urbanization             | Metf.    |                                                                |                                  |                                                      |                                                         |                                                   | ++ [42]                                         |  |
| Hospital bets (cat.)              | Metf.    |                                                                |                                  |                                                      |                                                         | ++ [35]                                           |                                                 |  |
| Health insurance                  | Metf.    |                                                                |                                  |                                                      |                                                         | ++ [23]                                           | +++ [22]                                        |  |
| Co-payment (cat.)                 | Metf.    |                                                                |                                  |                                                      |                                                         |                                                   | +++ [22]                                        |  |
| Costs drugs (cat.)                | Metf.    |                                                                | ++[19]                           |                                                      |                                                         |                                                   |                                                 |  |
| Brand/generic ratio               | Metf.    |                                                                |                                  | ++[31]                                               | ++[31]                                                  |                                                   |                                                 |  |

+++ , variable with statistically significant association with the outcome in both univariable and multivariable analyses; ++, variable with statistically significant association with the outcome only in multivariable analysis; +, variable with statistically significant association with the outcome only in univariable analysis; - - - ,variable with no statistically significant association with the outcome in both univariable and multivariable analyses; - - ,variable with no statistically significant association with the outcome in multivariable analyses - , variable with no statistically significant association with the outcome only in univariable analysis;

Metf., metformin; SU, sulfonylureas; DPP4i, dipeptidyl peptidase-4 inhibitor; W/CVB, drugs without cardiovascular benefits (sulfonylureas, dipeptidyl peptidase-4 inhibitor, thiazolidinediones,  $\alpha$ -glucosidase inhibitors, amylin mimetics agents, dopamine receptor agonists, and meglitinides); WCVB, drugs with cardiovascular benefits (Sodium glucose cotransporter 2 inhibitors, glucagon-like peptide-1 receptor agonists); MT, monotherapy; AHA, other antidiabetic agents can include monotherapy or combination therapy; TZDs, thiazolidinediones; CT, combination therapy; HbA1c, glycated haemoglobin; cont., continuous; cat., categorical;

Databases: <sup>1</sup>Data from USA Medicare; <sup>2</sup>Data from Clinformatics; Period: <sup>TA</sup> Apr 13 to Sept 15; <sup>TB</sup> Oct 15 to Dec 17; <sup>TC</sup> Jan 18 to Dec 19; ALX, all except references mentioned in the same space [31]; Statistical analysis used: <sup>LR</sup>Data from logistic regression [42], <sup>ML</sup>Data from multilevel model [42]; (if no indication is provided, a statistically significant association was found in all);

Table 6: Strength of association between patient-related factors: sociodemographic, lifestyle and metabolic with the outcomes.

| Patient-related factors Sociodemographic | Outcomes |                |                                                    |                                                        |                                                        |                          |                                              |                                            |
|------------------------------------------|----------|----------------|----------------------------------------------------|--------------------------------------------------------|--------------------------------------------------------|--------------------------|----------------------------------------------|--------------------------------------------|
|                                          | Metf.    | Metf.          | SU                                                 | W/CVB                                                  | WCVB                                                   | MT                       | AHA                                          | CT                                         |
| Age (cont.)                              | Metf.    |                | +++[36]<br>++[17][19][40]<br>+[16][41]             | ++[31]                                                 | ++[31]                                                 |                          | ++[30]                                       |                                            |
|                                          | DPP4i    | + [24]         |                                                    |                                                        |                                                        |                          |                                              |                                            |
| Age (cat.)                               | CT       |                |                                                    |                                                        |                                                        | + [26][27]               |                                              |                                            |
|                                          | Metf.    |                | +++[16]<br>++[18][13][29]                          |                                                        |                                                        | ++[23][34][29]           | +++[22]<br>++[37][42]                        |                                            |
|                                          | TZDs     | ++[13]         |                                                    |                                                        |                                                        |                          |                                              |                                            |
| Age (cat.) and health insurance          | CT       | ++[13][29]     | --[13]                                             |                                                        |                                                        |                          |                                              |                                            |
|                                          | ---      | + [14][15][20] |                                                    |                                                        |                                                        |                          |                                              |                                            |
| Gender                                   | Metf.    |                | +++[16]<br>++[19]<br>--[36]<br>-- [17][13][40][29] | ++[31] <sup>ALX</sup><br>--[31] <sup>2(TC)</sup>       | ++[31] <sup>ALX</sup><br>--[31] <sup>1(TA,TB)</sup>    | ++[23][34][35]<br>--[29] | +++[22]<br>++[42]<br>--[37][30]              |                                            |
|                                          | TZDs     | --[13]         |                                                    |                                                        |                                                        |                          |                                              |                                            |
|                                          | DPP4i    | + [24]         |                                                    |                                                        |                                                        |                          |                                              |                                            |
|                                          | CT       | ++[13][29]     | --[13]                                             |                                                        |                                                        | + [26]<br>- [27]         |                                              |                                            |
|                                          | ---      | - [32]         |                                                    |                                                        |                                                        |                          |                                              | + [32] <sup>3</sup><br>- [32] <sup>3</sup> |
| Race/Ethnicity                           | Metf.    |                | +++[16]<br>++[19][13]                              | ++[31] <sup>1(TA,TB)</sup>                             | ++[31] <sup>1(TA,TB)</sup>                             |                          |                                              |                                            |
|                                          | TZDs     | --[13]         |                                                    |                                                        |                                                        |                          |                                              |                                            |
|                                          | CT       | --[13]         | --[13]                                             |                                                        |                                                        |                          |                                              |                                            |
| Socioeconomic status                     | Metf.    |                | ++[19]<br>+[16]                                    |                                                        |                                                        | ++[23]                   | ++[42] <sup>LR</sup><br>--[42] <sup>ML</sup> |                                            |
|                                          | CT       |                |                                                    |                                                        |                                                        | - [27]                   |                                              |                                            |
| Doctor or has a doctor in family.        | Metf.    |                |                                                    |                                                        |                                                        |                          | ++[42] <sup>LR</sup><br>--[42] <sup>ML</sup> |                                            |
| Geographic region                        | Metf.    |                | ++[19]                                             | ++[31]                                                 | ++[31]                                                 |                          |                                              |                                            |
|                                          | CT       |                |                                                    |                                                        |                                                        | + [26][27]               |                                              |                                            |
| Immigrant status                         | Metf.    |                |                                                    |                                                        |                                                        | + [27]                   |                                              |                                            |
| <b>Lifestyle and metabolic</b>           |          |                |                                                    |                                                        |                                                        |                          |                                              |                                            |
| BMI (cont.)                              | Metf.    |                | ++[17][40]<br>+[16]                                |                                                        |                                                        |                          |                                              |                                            |
|                                          | DPP4i    | + [24]         |                                                    |                                                        |                                                        |                          |                                              |                                            |
| BMI (cat.)                               | Metf.    |                | ++[18]                                             |                                                        |                                                        |                          |                                              |                                            |
| Obesity or overweight                    | Metf.    |                |                                                    | ++[31]                                                 | ++[31]                                                 |                          |                                              |                                            |
| Smoker (cat.)                            | Metf.    |                |                                                    | ++[31] <sup>2(TA,TB)</sup><br>--[31] <sup>ALX</sup>    | ++[31] <sup>ALX</sup><br>--[31] <sup>1(TB),2(TC)</sup> |                          |                                              |                                            |
|                                          | Metf.    |                | + [16]<br>--[16]                                   |                                                        |                                                        |                          |                                              |                                            |
| Ex-smoker (cat.)                         | Metf.    |                | --[16]                                             |                                                        |                                                        |                          |                                              |                                            |
| Current smoker (cat.)                    | Metf.    |                | --[17]                                             |                                                        |                                                        |                          |                                              |                                            |
| Substance abuse (cat.)                   | Metf.    |                |                                                    | ++[31] <sup>2(TA)</sup><br>--[31] <sup>ALX</sup>       | ++[31] <sup>ALX</sup><br>--[31] <sup>1(TA,TB)</sup>    |                          |                                              |                                            |
| Liver disease                            | Metf.    |                | +++[36]<br>++[18]                                  |                                                        |                                                        |                          |                                              |                                            |
|                                          | DPP4i    | - [24]         |                                                    |                                                        |                                                        |                          |                                              |                                            |
| Hyperlipidaemia                          | Metf.    |                | - [16]                                             | ++[31] <sup>ALX</sup><br>--[31] <sup>1(TA),2(TA)</sup> | ++[31]                                                 |                          |                                              |                                            |
| Dyslipidaemia                            | Metf.    |                | ++[29]                                             |                                                        |                                                        | ++[29]                   |                                              | ++[29]                                     |
| HDL (cont.)                              | Metf.    |                | - [16]                                             |                                                        |                                                        |                          |                                              |                                            |
| LDL (cont.)                              | Metf.    |                | + [16]                                             |                                                        |                                                        |                          |                                              |                                            |
| Lipid-lowering meds                      | Metf.    |                | +++[36]<br>--[17]                                  |                                                        |                                                        | ++[35]                   |                                              |                                            |
| Statin use                               | Metf.    |                |                                                    | ++[31]                                                 | ++[31]                                                 |                          |                                              |                                            |

+++ , variable with statistically significant association with the outcome in both univariable and multivariable analyses; ++ , variable with statistically significant association with the outcome only in multivariable analysis; + , variable with statistically significant association with the outcome only in univariable analysis; - - - , variable with no statistically significant association with the outcome in both univariable and multivariable analyses; - - , variable with no statistically significant association with the outcome in multivariable analyses - , variable with no statistically significant association with the outcome only in univariable analysis;

Metf., metformin; SU, sulfonylureas; W/CVB, drugs without cardiovascular benefits (sulfonylureas, dipeptidyl peptidase-4 inhibitor, thiazolidinediones,  $\alpha$ -glucosidase inhibitors, amylin mimetics agents, dopamine receptor agonists, and meglitinides); WCVB, drugs with cardiovascular benefits (Sodium glucose cotransporter 2 inhibitors, glucagon-like peptide-1 receptor agonists); MT, monotherapy; AHA, other antidiabetic agents can include monotherapy or combination therapy; CT, combination therapy; DPP4i, dipeptidyl peptidase-4 inhibitor; TZDs, thiazolidinediones; BMI, body mass index; HDL, high-density lipoprotein; LDL, low-density lipoprotein; cont., continuous; cat., categorical; Databases: <sup>1</sup>Data from USA Medicare; <sup>2</sup>Data from Clinformatics; Period: <sup>TA</sup> Apr 13 to Sept 15; <sup>TB</sup> Oct 15 to Dec 17; <sup>TC</sup> Jan 18 to Dec 19; ALX, all except references mentioned in the same space [31]; Statistical analysis used.: <sup>LR</sup>Data from logistic regression [42], <sup>ML</sup>Data from multilevel model [42]; (if no indication is provided, a statistically significant association was found in all);

<sup>3</sup>Combination therapy between metformin and DPP4i, metformin and SGLT2i, metformin and TZDs (pioglitazone) showed statistical significance, and combination therapy between metformin and sulfonylureas, TZDs (pioglitazone) and DPP4i (alogliptin) did not show statistical significance;

Table 7: Strength of association between patient-related factors: cardiovascular and renal with the outcomes.

| Patient-related factors: Cardiovascular            | Outcomes   |        |                                            |        |                                                       |                                                       |        |        |        |
|----------------------------------------------------|------------|--------|--------------------------------------------|--------|-------------------------------------------------------|-------------------------------------------------------|--------|--------|--------|
|                                                    | Metf.      | Metf.  | SU                                         | DPP4i  | W/CVB                                                 | WCVB                                                  | MT     | AHA    | CT     |
| Hypertension                                       | Metf.      |        | +++[36]<br>++[40]<br>+[16]<br>--[29]       |        | ++[31]                                                | ++[31]                                                | --[29] |        | --[29] |
| Coagulopathy                                       | Metf.      |        | +[36]<br>--[36]                            |        |                                                       |                                                       |        |        |        |
| Cardiovascular disease                             | Metf.      |        | ++[19]<br>+[16]                            |        | ++[31]                                                | ++[31]                                                |        | --[37] |        |
| IHD                                                | Metf.      | --[33] | +[36]<br>--[36]                            |        |                                                       |                                                       | ++[35] |        |        |
| IHD/angina                                         | Metf.      |        | --[29]                                     |        |                                                       |                                                       | --[29] |        | --[29] |
| IHD/hypertension                                   | Metf.      |        | --[29]                                     |        |                                                       |                                                       | --[29] |        | --[29] |
| IHD/Stroke                                         | Metf.      |        |                                            | + [24] |                                                       |                                                       |        |        |        |
| Coronary atherosclerosis of native coronary artery | Pio (TZDs) | ++[39] |                                            |        |                                                       |                                                       |        |        |        |
| Heart failure                                      | Metf.      |        | +++[36]<br>++[29]<br>+[16]                 |        |                                                       |                                                       | --[29] |        | ++[29] |
| Valvular disease                                   | Metf.      |        | +++[36]                                    |        |                                                       |                                                       |        |        |        |
| Arrhythmia                                         | Metf.      |        | +[36]<br>--[36]                            |        |                                                       |                                                       |        |        |        |
| Atrial fibrillation                                | Metf.      |        | ++[29]                                     |        |                                                       |                                                       | --[29] |        | --[29] |
| Peripheral vascular disease                        | Metf.      |        | +[36]<br>--[36]                            |        |                                                       |                                                       |        |        |        |
| Cerebrovascular disease                            | Metf.      |        | ++[29]<br>+[36]<br>--[36]                  |        |                                                       |                                                       | --[29] |        | ++[29] |
| Micro/macrovascular complications                  | CT         |        |                                            |        |                                                       |                                                       | + [26] |        |        |
| Microvascular complications                        | Metf.      |        |                                            |        | ++[31]                                                | ++[31] <sup>ALX</sup><br>--[31] <sup>2(TA)</sup>      |        |        |        |
| Diabetic retinopathy                               | Metf.      |        | --[36]<br>--[18]                           | + [24] |                                                       |                                                       |        |        |        |
| Diabetic neuropathy                                | Metf.      |        | --[36]<br>--[18]                           | - [24] |                                                       |                                                       |        |        |        |
| Cardiovascular meds                                | Metf.      |        | ++[18] <sup>3</sup><br>--[18] <sup>4</sup> |        |                                                       |                                                       |        |        |        |
| Antihypertensive meds                              | Metf.      |        | --[17]                                     |        |                                                       |                                                       | ++[35] |        |        |
| ACE inhibitors or ARBs                             | Metf.      |        |                                            |        | ++[31]                                                | ++[31]                                                |        |        |        |
| Beta-blockers                                      | Metf.      |        |                                            |        | ++[31] <sup>1(TB)</sup><br>--[31] <sup>ALX</sup>      | --[31]                                                |        |        |        |
| Calcium channel blockers                           | Metf.      |        |                                            |        | ++[31] <sup>1(TA)2(TC)</sup><br>--[31] <sup>ALX</sup> | ++[31] <sup>2(TA,TC)</sup><br>--[31] <sup>ALX</sup>   |        |        |        |
| Loop diuretics                                     | Metf.      |        |                                            |        | ++[31]                                                | ++[31] <sup>ALX</sup><br>--[31] <sup>2(TA)</sup>      |        |        |        |
| Thiazide diuretics                                 | Metf.      |        |                                            |        | ++[31]                                                | ++[31] <sup>ALX</sup><br>--[31] <sup>1(TB)</sup>      |        |        |        |
| Anticoagulants meds                                | Metf.      |        |                                            |        | ++[31] <sup>2(TC)</sup><br>--[31] <sup>ALX</sup>      | ++[31] <sup>ALX</sup><br>--[31] <sup>1(TA)2(TC)</sup> |        |        |        |
| Antiplatelet meds                                  | Metf.      |        |                                            |        | ++[31]                                                | ++[31] <sup>ALX</sup><br>--[31] <sup>1(TB)2(TB)</sup> |        |        |        |
| <b>Renal</b>                                       |            |        |                                            |        |                                                       |                                                       |        |        |        |
| Serum creatinine (cont.)                           | Metf.      |        | +[16]                                      |        |                                                       |                                                       |        |        |        |
| Serum creatinine (cat.)                            | Metf.      |        | +++[16]<br>++[13]                          |        |                                                       |                                                       |        |        | --[13] |
|                                                    | TZDs       | ++[13] |                                            |        |                                                       |                                                       |        |        |        |
|                                                    | CT         |        | ++[13]                                     |        |                                                       |                                                       |        |        |        |
| Renal disease                                      | Metf.      |        |                                            | + [24] |                                                       |                                                       |        | ++[37] |        |
| Chronic kidney disease                             | Metf.      |        | +++[16]<br>++[19][18]                      |        | ++[31]                                                | ++[31]                                                | --[35] |        |        |
|                                                    | CT         |        |                                            |        |                                                       |                                                       | + [27] |        |        |
| Renal failure                                      | Metf.      |        | +[16]                                      |        |                                                       |                                                       |        |        |        |
|                                                    | Glip (SU)  | ++[39] |                                            |        |                                                       |                                                       |        |        |        |
| Diabetic nephropathy                               | Metf.      |        | +++[36]                                    | - [24] |                                                       |                                                       |        |        |        |
|                                                    | Glip (SU)  | ++[39] |                                            |        |                                                       |                                                       |        |        |        |

+++ , variable with statistically significant association with the outcome in both univariable and multivariable analyses; ++ , variable with statistically significant association with the outcome only in multivariable analysis; + , variable with statistically significant association with the outcome only in univariable analysis; - - - , variable with no statistically significant association with the outcome in both univariable and multivariable analyses; - - , variable with no statistically significant association with the outcome in multivariable analyses - , variable with no statistically significant association with the outcome only in univariable analysis;

Metf., metformin; SU, sulfonylureas; DPP4i, dipeptidyl peptidase-4 inhibitor; W/CVB, drugs without cardiovascular benefits (sulfonylureas, dipeptidyl peptidase-4 inhibitor, thiazolidinediones,  $\alpha$ -glucosidase inhibitors, amylin mimetics agents, dopamine receptor agonists, and meglitinides); WCVB, drugs with cardiovascular benefits (Sodium glucose cotransporter 2 inhibitors, glucagon-like peptide-1 receptor agonists); MT, monotherapy; AHA, other antidiabetic agents can include monotherapy or combination therapy; CT, combination therapy; Pio, pioglitazone; TZDs, thiazolidinediones; Glip, glipizide; IHD, ischemic heart disease; ACE, angiotensin-converting enzyme; ARBs, angiotensin receptor blockers; cont., continuous; cat., categorical;

Databases: <sup>1</sup>Data from USA Medicare; <sup>2</sup>Data from Clinformatics; Period: <sup>TA</sup> Apr 13 to Sept 15; <sup>TB</sup> Oct 15 to Dec 17; <sup>TC</sup> Jan 18 to Dec 19; ALX, all except references mentioned in the same space [31] (if no indication is provided, a statistically significant association was found in all); <sup>3</sup>current use; <sup>4</sup>previous use;

Table 8: Strength of association between patient-related factors: other clinical with the outcomes.

| Patient-related factors: Other clinical                               | Outcomes   |        |                                               |       |                                                          |                                                     |          |          |         |
|-----------------------------------------------------------------------|------------|--------|-----------------------------------------------|-------|----------------------------------------------------------|-----------------------------------------------------|----------|----------|---------|
|                                                                       |            | Metf.  | SU                                            | DPP4i | W/CVB                                                    | WCVB                                                | MT       | AHA      | CT      |
| Esophageal varices, without bleeding, in disease classified elsewhere | Glip (SU)  | ++[39] |                                               |       |                                                          |                                                     |          |          |         |
| Fluid and electrolyte disorder                                        | Metf.      |        | + [36]<br>- - [36]                            |       |                                                          |                                                     |          |          |         |
| Paracetamol                                                           | Pio (TZDs) | ++[39] |                                               |       |                                                          |                                                     |          |          |         |
| COPD                                                                  | Metf.      |        | + [36]<br>- - [36]                            |       | ++ [31] <sup>1(TA)2(TA)</sup><br>- - [31] <sup>ALX</sup> | ++ [31] <sup>1(TC)</sup><br>- - [31] <sup>ALX</sup> |          |          |         |
| Pulmonary collapse                                                    | Pio (TZDs) | ++[39] |                                               |       |                                                          |                                                     |          |          |         |
| Dementia                                                              | Metf.      |        | ++ [18]                                       |       |                                                          |                                                     |          |          |         |
| Depression                                                            | Metf.      |        | ++ [29]<br>+ [16][36]<br>- - [36]             |       |                                                          |                                                     | - - [29] |          | ++ [29] |
| Neuro-psychiatric meds                                                | CT         |        |                                               |       |                                                          |                                                     | + [26]   |          |         |
| Antipsychotic meds                                                    | Metf.      |        | - - [18] <sup>3,4</sup>                       |       |                                                          |                                                     |          |          |         |
| Cancer                                                                | Metf.      |        | +++ [36]                                      |       |                                                          |                                                     |          |          |         |
| Lymphoma                                                              | Metf.      |        | + [36]<br>- - [36]                            |       |                                                          |                                                     |          |          |         |
| Hypothyroidism                                                        | Metf.      |        | - - - [36]                                    |       |                                                          |                                                     |          |          |         |
| Rheumatoid arthritis                                                  | Metf.      |        | + [36]<br>- - [36]                            |       |                                                          |                                                     |          |          |         |
| Immune modulators/suppressants                                        | Metf.      |        | ++ [18] <sup>3</sup><br>- - [18] <sup>4</sup> |       |                                                          |                                                     |          |          |         |
| Oral corticosteroids                                                  | Metf.      |        | ++ [18] <sup>3</sup><br>- - [18] <sup>4</sup> |       |                                                          |                                                     |          |          |         |
| Tacrolimus                                                            | Glip (SU)  | ++[39] |                                               |       |                                                          |                                                     |          |          |         |
| Cefepime                                                              | Glip (SU)  | ++[39] |                                               |       |                                                          |                                                     |          |          |         |
| Medication use (cont.)                                                | Metf.      |        | - - [19]                                      |       |                                                          |                                                     | ++ [23]  |          |         |
|                                                                       | CT         |        |                                               |       |                                                          |                                                     | + [27]   |          |         |
| Medication use (cat.)                                                 | Metf.      |        |                                               |       |                                                          |                                                     |          | +++ [22] |         |
|                                                                       | CT         |        |                                               |       |                                                          |                                                     | + [26]   |          |         |
| Comorbidities (cont.)                                                 | Metf.      |        | ++ [19]                                       |       |                                                          |                                                     |          |          |         |
|                                                                       | CT         |        |                                               |       |                                                          |                                                     | + [27]   |          |         |
| Comorbidities (cat.)                                                  | Metf.      |        | ++ [29]                                       |       |                                                          |                                                     | ++ [29]  | ++ [30]  | ++ [29] |
| Quan Score (cont.)                                                    | Metf.      |        | + [16]                                        |       |                                                          |                                                     |          |          |         |
| Rx-Risk comorbidity index (cont.)                                     | CT         |        |                                               |       |                                                          |                                                     | + [26]   |          |         |

+++ , variable with statistically significant association with the outcome in both univariable and multivariable analyses; ++ , variable with statistically significant association with the outcome only in multivariable analysis; + , variable with statistically significant association with the outcome only in univariable analysis; - - - , variable with no statistically significant association with the outcome in both univariable and multivariable analyses; - - , variable with no statistically significant association with the outcome in multivariable analyses - , variable with no statistically significant association with the outcome only in univariable analysis;

Metf., metformin; SU, sulfonylureas; DPP4i, dipeptidyl peptidase-4 inhibitor; W/CVB, drugs without cardiovascular benefits (sulfonylureas, dipeptidyl peptidase-4 inhibitor, thiazolidinediones,  $\alpha$ -glucosidase inhibitors, amylin mimetics agents, dopamine receptor agonists, and meglitinides); WCVB, drugs with cardiovascular benefits (Sodium glucose cotransporter 2 inhibitors, glucagon-like peptide-1 receptor agonists); MT, monotherapy; AHA, other antidiabetic agents can include monotherapy or combination therapy; CT, combination therapy; Glip, glipizide; Pio, pioglitazone; TZDs, thiazolidinediones; COPD, chronic obstructive pulmonary disease; cont., continuous; cat., categorical;

Databases: <sup>1</sup>Data from USA Medicare; <sup>2</sup>Data from Clinformatics; Period: <sup>TA</sup> Apr 13 to Sept 15; <sup>TB</sup> Oct 15 to Dec 17; <sup>TC</sup> Jan 18 to Dec 19; ALX, all except references mentioned in the same space [31] (if no indication is provided, a statistically significant association was found in all); <sup>3</sup>current use; <sup>4</sup>previous use;

Table 9: Strength of association between disease-related factors with the outcomes.

| Disease-related factors                   | Outcomes          |        |                              |        |       |                                                      |                                                    |       |                                             |        |
|-------------------------------------------|-------------------|--------|------------------------------|--------|-------|------------------------------------------------------|----------------------------------------------------|-------|---------------------------------------------|--------|
|                                           | Metf.             | Metf.  | SU                           | TZDs   | DPP4i | W/CVB                                                | WCVB                                               | MT    | AHA                                         | CT     |
| HbA1c (cont.)                             | <b>Metf.</b>      |        | ++[17][40]<br>+[16]<br>-[41] |        | +[24] |                                                      |                                                    |       | ++[30]                                      |        |
| HbA1c (cat.)                              | <b>Metf.</b>      |        | +++[16]<br>++[18][13]        | --[13] |       |                                                      |                                                    |       |                                             | ++[13] |
|                                           | <b>CT</b>         |        | ++[13]                       |        |       |                                                      |                                                    | +[21] |                                             |        |
| Fasting glucose (cont.)                   | <b>Metf.</b>      |        | +[16]                        |        |       |                                                      |                                                    |       |                                             |        |
| Random glucose (cont.)                    | <b>Metf.</b>      |        | +[16]                        |        |       |                                                      |                                                    |       |                                             |        |
| Glucose                                   | <b>Pio (TZDs)</b> | ++[39] |                              |        |       |                                                      |                                                    |       |                                             |        |
| Diabetes duration (cont.)                 | <b>Metf.</b>      |        | ++[17][40]                   |        |       |                                                      |                                                    |       |                                             |        |
| Time to initiation (cont.)                | <b>Metf.</b>      |        | ++[17]                       |        |       |                                                      |                                                    |       |                                             |        |
|                                           | <b>CT</b>         |        |                              |        |       |                                                      |                                                    | +[21] |                                             |        |
| Number antidiabetics at initiation (cat.) | <b>Metf.</b>      |        |                              |        |       |                                                      |                                                    |       | --[37]                                      |        |
| Diabetes without complications            | <b>Pio (TZDs)</b> | ++[39] |                              |        |       |                                                      |                                                    |       |                                             |        |
| Hypoglycaemic events (cat.)               | <b>Metf.</b>      |        |                              |        |       | ++[31] <sup>ALX</sup><br>-[31] <sup>1(TB)2(TB)</sup> | ++[31] <sup>ALX</sup><br>-[31] <sup>1(TA,TB)</sup> |       |                                             |        |
| DCSI (cat.)                               | <b>Metf.</b>      |        |                              |        |       |                                                      |                                                    |       | ++[42] <sup>LR</sup><br>-[42] <sup>ML</sup> |        |

00 +++ , variable with statistically significant association with the outcome in both univariable and multivariable analyses; ++ , variable with statistically  
 01 significant association with the outcome only in multivariable analysis; + , variable with statistically significant association with the outcome only in univariable  
 02 analysis; - - - , variable with no statistically significant association with the outcome in both univariable and multivariable analyses; - - , variable with no  
 03 statistically significant association with the outcome in multivariable analyses - , variable with no statistically significant association with the outcome only in  
 04 univariable analysis;

05 Metf., metformin; SU, sulfonylureas; TZDs, thiazolidinediones; DPP4i, dipeptidyl peptidase-4 inhibitor; W/CVB, drugs without cardiovascular benefits  
 06 (sulfonylureas, dipeptidyl peptidase-4 inhibitor, thiazolidinediones,  $\alpha$ -glucosidase inhibitors, amylin mimetics agents, dopamine receptor agonists, and  
 07 meglitinides); WCVB, drugs with cardiovascular benefits (Sodium glucose cotransporter 2 inhibitors, glucagon-like peptide-1 receptor agonists); MT,  
 08 monotherapy; AHA, other antidiabetic agents can include monotherapy or combination therapy; CT, combination therapy; Pio; pioglitazone; HbA1c,  
 09 glycated haemoglobin; DCSI, diabetes complication severity index; cont., continuous; cat., categorical;

10 Databases: <sup>1</sup>Data from USA Medicare; <sup>2</sup>Data from Clinformatics; Period: <sup>TA</sup> Apr 13 to Sept 15; <sup>TB</sup> Oct 15 to Dec 17; <sup>TC</sup> Jan 18 to Dec 19; ALX, all except  
 11 references mentioned in the same space [31]; Statistical analysis used: <sup>LR</sup>Data from logistic regression [42], <sup>ML</sup>Data from multilevel model [42]  
 12

### 313 **Physician-related factors**

314 Table 4 shows that physician age presented a statistical association with the prescription profile [22, 42],  
315 with older physicians prescribing non-metformin treatments more frequently than metformin. Three studies  
316 [22, 37, 42] reported a non-association between gender and initial therapy choice. Only Liu *et al.* [42] found  
317 that male physicians had a higher chance of prescribing non-metformin than female physicians in logistic  
318 regression. Physician speciality was the most assessed variable in this category, with six studies [22, 25, 28,  
319 30, 31, 42] showing a statistically significant association. Campbell *et al.*[30] stated that specialists were more  
320 likely to prescribe metformin in combination or other drug therapies instead of metformin alone compared  
321 to general practitioners (GPs). Pinto *et al.* [25] also reported that GPs had a lower prevalence of prescribed  
322 combined therapy than other specialists (4.2% vs 33.3%, p-value <0.001). However, no significant  
323 differences were found in the prescription rates of metformin alone or in combination between GPs and  
324 other specialists. Another study [42] presented that GPs had a higher chance of prescribing non-metformin  
325 than metformin compared to endocrinologists. In contrast, Shin *et al.*[31] observed that individuals visiting  
326 endocrinologists had a lower chance of initiating metformin than other drugs independently of their  
327 cardiovascular benefits; the opposite was found when visiting internists. Finally, the two additional variables,  
328 years of experience and the medical evidence questionnaire, assessed by Wang *et al.* [37] presented a non-  
329 statistically significant association.

### 330 **Healthcare system-related factors**

331 Eleven studies [13, 16, 17, 19, 22, 23, 29, 31, 35, 36, 42] demonstrated a statistically significant association  
332 between more recent time periods and the prescription profile. However, in two studies, this depended on  
333 the analysed database [31] or medicine and the respective comparison [13] to report statistical significance.  
334 Studies reported that the most recent periods were positively associated with metformin initiation [19, 31],  
335 and also when compared with sulfonylureas [16, 17, 29, 36], other monotherapies [23, 35], other antidiabetic  
336 agents (eventually in monotherapy or combination therapy) [22, 42] or combination therapy [29].  
337 Additionally, Wang *et al.* [37] studied how primary care physicians responded to a change in the Canadian  
338 Diabetes Association Guidelines, which significantly increased metformin initiation as a first line, except  
339 when compared to sulfonylureas.



340 One cross-sectional study [31] reported that individuals with three or more HbA1c tests within 365 days  
341 before the index date had higher odds of initiating any other medicine than metformin, irrespective of their  
342 cardiovascular benefits. Additionally, variables such as the number of office visits [24, 36], hospitalisations  
343 [19, 36], emergency visits [36], and the length of stay [22] were statistically significantly associated with lower  
344 odds of metformin prescriptions. However, Abdelmoneim *et al.* [36] and Shin *et al.* [31] reported no  
345 statistically significant association with some of these variables (see Table 5).

346 Two studies [22, 23] reported an association between the health insurance and the initial therapy choice.  
347 Regarding the co-payment and cost of drugs, one study [22] indicated that individuals with co-payment  
348 waiver had a lower chance of starting metformin than sulfonylureas, the same that Li [19] found for  
349 individuals in the top 10% of prescription drug expenses under Medicare Part D. Medicare is a health  
350 program for individuals aged 65 and over and younger individuals with disabilities, with Medicare Part D  
351 being an optional plan that covers drug costs[44]. Shin *et al.* [31] stated that individuals with more brand-  
352 name experience also had a lower chance of starting metformin than drugs independently of their  
353 cardiovascular benefits.

### 354 **Patient-related factors: Sociodemographic**

355 Twenty-two studies [13–20, 22–24, 26, 27, 29–31, 34, 36, 37, 40–42] evaluated the association between  
356 age and initial therapy choice. Metformin prescription was associated with younger individuals compared to  
357 sulfonylureas [13, 16–19, 29, 36, 40, 41], other antidiabetic agents (including monotherapy (MT) and  
358 eventually MT and combination therapy (AHA)) [22, 29, 30, 34, 37, 42], thiazolidinediones [13], DPP4i [24],  
359 and drugs without cardiovascular benefits [31]. Even when the interaction between age and type of insurance  
360 was studied [35], metformin prescription decreased with advancing age compared to other monotherapies.  
361 On the other hand, when metformin is compared with drugs with cardiovascular benefits, the chance of  
362 prescribing increases with age [31]. Two studies [13, 29] found a significant but inverse association between  
363 age and combination therapy. The other two studies [26, 27] indicated that younger people were more  
364 prevalent in combination therapy than monotherapy. Moreover, one study [13] found no association  
365 between age and combination therapy compared to sulfonylureas.

366 Nineteen studies tested the association between gender and prescription profile [13, 16, 17, 19, 22–24,  
367 26, 27, 29–32, 34–37, 40, 42]. Nine studies [16, 19, 22–24, 26, 34, 35, 42] showed a statistically significant

368 association and six none [17, 27, 30, 32, 37, 40]. In the remaining four studies [13, 29, 31, 32] several analysis  
369 were conducted within each study. This led to the report of statistically significant associations depending  
370 on the prescribing profile evaluated (i.e., the same study analysed different prescribing profiles with gender)  
371 or the database analysed (i.e., the same study analysed two different databases). The statistical associations  
372 found that females were more likely to initiate metformin than men compared to sulfonylureas [16, 19],  
373 other monotherapies [34, 35], other antidiabetic agents [42] or DPP4i [24]. On the other hand, Winkelmayr  
374 *et al.* [22] identified a significant association, though its direction varied between univariate and multivariate  
375 analyses, and Desai *et al.* [23] noted that men had a higher chance of starting metformin than other  
376 monotherapies.

377 Regarding race/ethnicity, black individuals showed a lower chance of starting metformin than  
378 sulfonylureas compared to white individuals [13, 16, 19]. White individuals also showed more chance of  
379 starting drugs with cardiovascular benefits than metformin compared to non-white [31]. However, there  
380 was no statistically significant association between race/ethnicity and combination therapy compared to  
381 metformin or sulfonylureas [13].

382 Individuals with lower socioeconomic status were associated with more frequent non-metformin  
383 prescriptions [23, 42] or sulfonylurea prescriptions [16, 19], compared to metformin. Conversely, Liu *et al.*  
384 [42] also found the same for a higher socioeconomic status category, and statistical significance was lost in  
385 the multilevel linear model.

## 386 **Patient-related factors: Lifestyle and metabolic**

387 Nine studies [16–18, 24, 29, 31, 35, 36, 40] evaluated at least one lifestyle or metabolic variable (Table  
388 6). A higher body mass index (BMI) was significantly associated with an increased chance of starting  
389 metformin compared to sulfonylureas [16–18, 40], DPP4i [24], or drugs without cardiovascular benefits [31].  
390 However, when compared to drugs with cardiovascular benefits, the chance of prescribing metformin  
391 decreased with a higher BMI [31]. Liver disease was associated with a decreased chance of starting  
392 metformin compared to sulfonylureas [18, 36]. However, no statistical significance was found when  
393 compared to DPP4i. Individuals with dyslipidaemia showed higher odds of initiating combination therapy  
394 than metformin [29]. For other variables in this group, either no statistical significance was found, or the  
395 direction of associations was inconclusive.

## 396 **Patient-related factors: Cardiovascular**

397 The impact of twenty-seven cardiovascular variables (the most representative group of variables) was  
398 assessed in fourteen studies [16–19, 24, 26, 29, 31, 33, 35–37, 39, 40]. Hypertension was evaluated with  
399 initial therapy choice in five studies [16, 29, 31, 36, 40]. Three studies [16, 36, 40] showed statistical  
400 significance, but with conflicting results. Abdelmoneim *et al.* [36] found that hypertension increased the odds  
401 of starting metformin compared to sulfonylureas, while Fujihara *et al.* [40] reported the opposite. Shin *et al.*  
402 [31] also linked hypertension to a decreased chance of starting metformin compared to drugs with or without  
403 cardiovascular benefits. However, Shin *et al.* [31] found that the use of angiotensin-converting enzyme  
404 inhibitors and angiotensin receptor blockers (antihypertensive drugs) increased the odds of initiating  
405 metformin. No significant association was found between hypertension and combination therapy compared  
406 to metformin [29].

407 Two studies [16, 19] reported that cardiovascular disease was negatively associated with metformin  
408 initiation compared to sulfonylureas. Similarly, Shin *et al.* [31] found the same when comparing metformin  
409 to drugs with or without cardiovascular benefits. No statistically significant association was found by Wang  
410 *et al.* [37].

411 Three studies [16, 29, 36] reported that heart failure was negatively associated with metformin compared  
412 to sulfonylureas. Additionally, Wood *et al.* [29] reported that individuals with heart failure had higher odds  
413 of initiating combination therapy rather than metformin. Similarly, cerebrovascular disease decreased the  
414 odds of initiating metformin compared to sulfonylureas or combination therapy, although no significant  
415 association was found when comparing metformin to non-metformin therapies for either heart failure or  
416 cerebrovascular disease [29]. The valvular disease kept the tendency reported, and it was associated with a  
417 decreased chance of initiating metformin compared to sulfonylureas [36].

## 418 **Patient-related factors: Renal**

419 Eleven studies [13, 16, 18, 19, 24, 27, 31, 35–37, 39] evaluated renal-related variables. It is unanimously  
420 reported that renal problems, such as elevated serum creatinine, renal disease, chronic renal disease (CKD),  
421 renal failure and diabetes-related nephropathy decreased the chance of metformin initiation [13, 16, 18, 19,  
422 24, 31, 35–37, 39]. For example, Raebel *et al.* [16] showed that individuals with serum creatine range of 1.4

423 to  $\leq 2$  mg/dl compared to individuals with  $< 1.4$  mg/dl (reference) had a relative risk of 2.21 (95% CI, 2.05-  
424 2.39) of starting sulfonylureas compared to metformin and Wang *et al.* [37] also showed that individuals with  
425 renal disease had lower odds (OR 0.14; 95% CI, 0.05-0.40) of starting metformin than other antidiabetic  
426 agents.

427 Regarding combination therapy, Brouwer *et al.* [13] reported that high serum creatinine decreased the  
428 chance of beginning combination therapy compared to sulfonylureas, and another study [27] stated a lower  
429 prescription of combination therapy compared to monotherapies such as sulfonylureas or DPP4i among  
430 individuals with CKD [27].

### 431 **Patient-related factors: Other clinical**

432 Twenty-one other clinical variables were assessed with the prescription profile in twelve studies [16, 18,  
433 19, 22, 23, 26, 27, 29–31, 36, 39]. Of these, 81% (17) of the variables were assessed by one study. Dementia  
434 was negatively associated with metformin initiation compared to sulfonylureas [18]. Wood *et al.* [29] reported  
435 that depression was positively associated with metformin initiation compared to sulfonylureas, which  
436 aligned with Raebel *et al.* [16] findings. However, these associations differed in direction from the univariable  
437 analysis results reported by Abdelmoneim *et al.* [36]. Wood *et al.* [29] also reported that depression was  
438 positively associated with metformin initiation compared with combination therapy, and statistical  
439 significance was not found comparing non-metformin monotherapies with metformin. Juste *et al.* [26]  
440 reported that the prevalence of neuro-psychiatric medication was higher among monotherapy initiators than  
441 among combination therapy initiators.

442 Regarding medication use, Desai *et al.* [23] reported that the chances of starting metformin than other  
443 monotherapies decreased for each additional prescription. However, Li [19] found no statistical association,  
444 and Winkelmayr *et al.* [22] observed that the odds of initiating metformin increased with a higher number  
445 of therapeutic class prescriptions compared to other antidiabetic agents. However, this pattern shifted in  
446 the univariable analysis, where individuals taking  $\geq 9$  medications had reduced odds of initiating metformin  
447 compared to those taking none. Two studies [26, 27] stated that the prevalence another type of medication  
448 was higher among monotherapy initiators than among combination therapy initiators.

449 Wood *et al.* [29] presented that individuals with one to three comorbidities had a lower chance of starting  
450 sulfonylureas than metformin compared to those with no comorbidities. No statistically significant

451 association was found when comparing four or more comorbidities to zero. Additionally, individuals with  
452 one to six comorbidities had lower odds of initiating non-metformin monotherapy compared to metformin,  
453 though this was not statistically significant when comparing seven or more comorbidities to zero.  
454 Nevertheless, compared to zero, one or more comorbidities reduced the odds of initiating combination  
455 therapy rather than metformin. Campbell *et al.* [30] also reported that individuals with one or more  
456 comorbidities were less likely to start metformin in combination therapy or other drug therapies, instead of  
457 metformin alone compared to those with no comorbidities. Additionally, Juste *et al.* [26] noted that  
458 individuals who initiated combination therapy had a lower comorbidity score compared to individuals who  
459 initiated monotherapy.

## 460 **Disease-related factors**

461 Data was extracted from fourteen studies [13, 16–18, 21, 24, 30, 31, 37–42] with ten variables collected.  
462 HbA1c was the most studied variable, being addressed in ten studies [13, 16–18, 21, 24, 30, 38, 40, 41]. Five  
463 studies [13, 16–18, 40] stated that higher HbA1c levels were statistically associated with the initial  
464 sulfonylureas therapy instead of metformin, but one study did not find statistical significance [41]. Campbell  
465 *et al.* [30] also indicated that individuals with a higher HbA1c level were more likely to start non-metformin  
466 and combination therapy than metformin alone. On the other hand, Morita *et al.* [24] reported the opposite  
467 when comparing metformin to DPP4i, and no statistically significant association was noted when comparing  
468 metformin to thiazolidinediones [13]. Combination therapy was statistically associated with higher levels of  
469 HbA1c compared to metformin, sulfonylureas [13] or monotherapy [21].

470 Raebel *et al.* [16] also assessed fasting and random glucose levels and reported that both levels were  
471 higher among those who initiated sulfonylureas than those who initiated metformin in univariable analysis.  
472 Vashisht *et al.* [39] identified glucose and diabetes without complications as variables statistically associated  
473 with pioglitazone (TZD) choice instead of metformin. However, the researchers did not specify how glucose  
474 was measured, nor did they clarify whether the association with pioglitazone was positive or negative.

475 Shorter diabetes duration [17, 40] and earlier treatment initiation [17] were statistically associated with  
476 metformin initiation compared to sulfonylureas. Ouchi *et al.* [21] also found that combination therapy (89.62  
477 days, SD 279.1) was prescribed significantly earlier ( $p < 0.001$ ) than monotherapy (190.7 days, SD 366.2).

478

## 479 Quality assessment

480 The quality assessment results for observational cohort studies are presented in Table 10. None of the  
 481 studies ensured the similarity between compared groups (exposed vs. unexposed). It was also impossible to  
 482 ensure exposures measured similarly between groups and their validity and reliability as all studies relied on  
 483 secondary data without detailing the method of exposure measurement. None of the studies identified  
 484 potential confounders or strategies to address them. Five studies [13, 16, 17, 19, 21] raised concerns about  
 485 outcome validity and reliability, as the data sources might have reflected treatment adherence (e.g., pharmacy  
 486 dispensing records) rather than prescriptions. Follow-up loss was either ignored [17] or avoided through  
 487 inclusion/exclusion criteria [13–16, 18–21] without strategies being expected to address it. Although five  
 488 studies [13, 16–19] used multivariable analysis (appropriate statistical analysis considered), none reported  
 489 statistical model assumptions, and one study [21] did not report the applied statistical analysis.

490

491 Table 10: Quality assessment and risk of bias of cohort studies included.

| Retrospective cohort studies  | Topics assessed |         |         |    |    |         |         |     |         |     |         |
|-------------------------------|-----------------|---------|---------|----|----|---------|---------|-----|---------|-----|---------|
|                               | D1              | D2      | D3      | D4 | D5 | D6      | D7      | D8  | D9      | D10 | D11     |
| <b>Brouwer et al.</b> [13]    | Unclear         | Unclear | Unclear | No | No | Unclear | Unclear | Yes | Unclear | N/A | Unclear |
| <b>Zhang et al.</b> [14]      | Unclear         | Unclear | Unclear | No | No | Yes     | Yes     | Yes | Unclear | N/A | No      |
| <b>Sinclair et al.</b> [15]   | Unclear         | Unclear | Unclear | No | No | Yes     | Yes     | Yes | Unclear | N/A | No      |
| <b>Raebel et al.</b> [16]     | Unclear         | Unclear | Unclear | No | No | Yes     | Unclear | Yes | Unclear | N/A | Unclear |
| <b>Geier et al.</b> [17]      | Unclear         | Unclear | Unclear | No | No | Yes     | Unclear | Yes | Unclear | N/A | Unclear |
| <b>Wright</b> [18]            | Unclear         | Unclear | Unclear | No | No | Yes     | Yes     | Yes | Unclear | N/A | Unclear |
| <b>Li</b> [19]                | Unclear         | Unclear | Unclear | No | No | Yes     | Unclear | Yes | Unclear | N/A | Unclear |
| <b>Carrillo Balam</b><br>[20] | Unclear         | Unclear | Unclear | No | No | Yes     | Yes     | Yes | Unclear | N/A | No      |
| <b>Ouchi et al.</b> [21]      | Unclear         | Unclear | Unclear | No | No | Unclear | Unclear | Yes | Unclear | N/A | Unclear |

492 D1. Were the two groups similar and recruited from the same population? D2. Were the exposures measured similarly to assign people to both  
 493 exposed and unposed groups? D3. Was the exposure measured in a valid and reliable way? D4. Were confounding factors identified? D5. Were  
 494 strategies to deal with confounding factors stated? D6. Were the groups/participants free of the outcome at the start of the study (or at the moment  
 495 of exposure)? D7. Were the outcomes measured in a valid and reliable way? D8. Was the follow up time reported and sufficient to be long enough  
 496 for outcomes to occur? D9. Was follow up complete, and if not, were the reasons to loss to follow up described and explored? D10. Were strategies  
 497 to address incomplete follow up utilized? D11. Was appropriate statistical analysis used? N/A, not applicable;  
 498

499 Table 11 presents the results of quality assessment for observational cross-sectional studies. Eight studies  
 500 [24, 28, 30, 32, 38–41] did not provide clear inclusion criteria, and eight studies [23, 25, 32–34, 39–41] lacked  
 501 information to infer the health status of the sample. It was also impossible to ensure exposures measured  
 502 validity and reliability. However, four studies [23, 25, 32, 34] reported exposures without a gold standard  
 503 measurement (e.g., age, sex, type of insurance), suggesting no risk of bias. Only two studies [30, 45] identified

504 potential confounders, but their statistical models also examined associations with the outcome, raising  
 505 doubts about their exclusive use for control. Therefore, only two other studies [28, 33] addressed  
 506 confounder factors by matching or stratification. Twelve studies [22, 23, 26, 27, 29–31, 34, 36–38, 42] relied  
 507 on pharmacy dispensing data or lacked clarity on data sources, undermining outcome validity and reliability.  
 508 None used appropriate statistical analyses due to missing multivariable analysis [24–28, 32, 33, 38, 41],  
 509 unreported statistical model assumptions [22, 23, 29–31, 34–37, 40, 42], or omission of p-value results [39].  
 510 Therefore, the quality assessment underscores multiple issues across the studies, pointing to a high risk of  
 511 bias.

512  
 513 Table 11: Quality assessment and risk of bias of cross-sectional studies included.

| Cross-sectional studies  | Topics assessed |     |         |         |         |         |         |         |
|--------------------------|-----------------|-----|---------|---------|---------|---------|---------|---------|
|                          | D1              | D2  | D3      | D4      | D5      | D6      | D7      | D8      |
| Winkelmayer et al.[22]   | Yes             | Yes | Unclear | Yes     | No      | No      | Unclear | Unclear |
| Desai et al.[23]         | Yes             | No  | N/A     | Yes     | No      | No      | Unclear | Unclear |
| Grimes et al. [34]       | Yes             | No  | N/A     | Yes     | No      | No      | Unclear | Unclear |
| Abdelmoneim et al.[36]   | Yes             | Yes | Unclear | Yes     | No      | No      | Unclear | Unclear |
| Wang et al. (2013)[37]   | Yes             | Yes | Unclear | Yes     | Yes     | Unclear | Unclear | Unclear |
| Mitchell et al.[38]      | No              | Yes | Unclear | Unclear | No      | No      | Unclear | No      |
| Vashisht et al.[39]      | No              | No  | Unclear | Yes     | No      | No      | Yes     | Unclear |
| Fujihara et al. [40]     | No              | No  | Unclear | Unclear | No      | No      | Yes     | Unclear |
| Tanabe et al. [41]       | No              | No  | Unclear | Unclear | No      | No      | Yes     | No      |
| Liu et al. [42]          | Yes             | Yes | Unclear | Yes     | No      | No      | Unclear | Unclear |
| Morita et al. [24]       | No              | Yes | Unclear | Yes     | No      | No      | Yes     | No      |
| Pinto et al. [25]        | Yes             | No  | N/A     | Yes     | No      | No      | Yes     | No      |
| Juste et al.[26]         | Yes             | Yes | Unclear | Yes     | No      | No      | Unclear | No      |
| Moreno-Juste et al. [27] | Yes             | Yes | Unclear | Yes     | No      | No      | Unclear | No      |
| Yabe et al. [28]         | No              | Yes | Unclear | Unclear | No      | Yes     | Yes     | No      |
| Wood et al. [29]         | Yes             | Yes | Unclear | Yes     | No      | No      | Unclear | Unclear |
| Campbell et al.[30]      | No              | Yes | Unclear | Yes     | Yes     | Unclear | Unclear | Unclear |
| Shin et al. (2021)[31]   | Yes             | Yes | Unclear | Yes     | No      | No      | Unclear | Unclear |
| Bonora et al.[32]        | No              | No  | N/A     | No      | No      | No      | Yes     | No      |
| Barth et al.[33]         | Yes             | No  | Unclear | Yes     | No      | Yes     | Yes     | No      |
| Bouchi et al.[35]        | Yes             | Yes | Unclear | Yes     | Unclear | Unclear | Yes     | Unclear |

514 D1. Were the criteria for inclusion in the sample clearly defined? D2. Were the study subjects and the setting described in detail? D3. Was the  
 515 exposure measured in a valid and reliable way? D4. Were objective, standard criteria used for measurement of the condition? D5. Were confounding  
 516 factors identified? D6. Were strategies to deal with confounding factors stated? D7. Were the outcomes measured in a valid and reliable way? D8.  
 517 Was appropriate statistical analysis used? N/A, not applicable;

518

519

520



## 521 Discussion

522 This systematic review identified 30 studies exploring factors influencing first-line treatment  
523 decisions in T2DM, focusing on metformin and combination therapy. Although clinical decision-  
524 making can be inherently complex, the identification of key factors serves two main purposes: first,  
525 it enables the alignment of clinical practice with evidence-based guidelines by addressing gaps in  
526 knowledge and practice patterns; second, it aids in tailoring treatment decisions to individual  
527 characteristics, thereby enhancing the quality of care and improving health outcomes.

528 The prevalence of the two initial therapies analysed varied widely across studies, with the greatest  
529 variation observed in metformin initiation. For instance, Morita *et al.* [24] reported that 7.1% of their  
530 sample started metformin monotherapy, while Campbell *et al.* [30] found that 89% of participants  
531 initiated metformin monotherapy. This discrepancy may be attributed to differences in national  
532 clinical guidelines: Canadian guidelines recommend metformin as the first-line treatment unless  
533 contraindicated [46], while Japanese guidelines do not specify a preferred drug for initiation [47]. This  
534 highlights how variations in regional clinical recommendations can significantly impact treatment  
535 patterns and decision-making processes.

536 One hundred and five variables were evaluated as potential predictive factors influencing initial  
537 therapy decisions, with only 9.5% (10) showing no association with initial therapy choice. Among  
538 these, 25 variables were assessed with combination therapy, with 18 (72%) evaluated in just one study.  
539 Notably, only 11 of the 105 variables were assessed in five or more studies, indicating limited  
540 replication and, consequently, reduced robustness for most findings.

541 Age and gender were the most frequently assessed variables, reflecting the accessibility of  
542 demographic data. On the other hand, physician-related factors were the group with the least  
543 variables evaluated, perhaps due to challenges in extracting this information from secondary data  
544 sources. In contrast, the subgroup of cardiovascular factors included the highest number of assessed  
545 variables, which may reflect researchers' interest in studying these factors and the emphasis of  
546 guidelines on cardiovascular diseases in individuals with T2DM [48, 49]. Furthermore, among the  
547 twenty-one variables categorized as other clinical factors, doubts arise about their clinical basis for



548 assessing their association with the initial therapy choice, potentially indicating that their availability  
549 is the primary reason for their assessment.

550 Interestingly, while physician age was associated with initial therapy choice, years of experience  
551 were not, yielding contradictory results since age is typically linked to years of experience. Moreover,  
552 a survey study [50] found that years of experience influenced the factors considered when selecting  
553 first-line treatment, and a chart review study [51] revealed that more experienced physicians were less  
554 likely to follow guidelines. These findings highlight the complexity of physician-related factors and  
555 their interplay with clinical decision-making. Additionally, regarding associations found with  
556 physician specialities, it is important to consider that access to these specialities is strongly influenced  
557 by the patient's health status and the severity of the disease [52]. Healthcare utilization is also  
558 significantly affected by the patient's socioeconomic status[53], and both socioeconomic status and  
559 health insurance were associated with initial therapy choice.

560 Patient-related factors, particularly age, also play a significant role in influencing therapy decisions,  
561 with metformin consistently linked to a younger age. A survey study [54] also reported that reasons  
562 cited by physicians to avoid initial dual therapy were often associated with patient age. Additionally,  
563 metformin initiation was negatively associated with several cardiovascular conditions and healthcare  
564 utilization, indicating a tendency to avoid metformin in individuals with poorer health status. This  
565 trend is surprising given its well-established safety profile [55] and its benefits for various conditions  
566 [56].

567 Concerns about these findings are heightened when comparing metformin to sulfonylureas, which  
568 are associated with an increased risk of hypoglycaemia [57]. Guidelines recommend a conservative  
569 approach to sulfonylureas, particularly in older individuals [4, 7, 58], and scientific literature highlights  
570 their potential harm in those at high risk for cardiovascular disease [59]. The preference for  
571 sulfonylureas over metformin at high HbA1c levels is not also supported by guideline  
572 recommendations [4] or scientific literature [60, 61].

573 On the other hand, renal-related factors present a valid reason for avoiding metformin, as it should  
574 not be used in individuals with an estimated glomerular filtration rate  $<30$  ml/min per  $1.73$  m<sup>2</sup> [62].  
575 This may explain why studies report that physicians are cautious about prescribing it to individuals

576 with renal problems. Similarly, for BMI, the findings also align with guideline recommendations [4,  
577 7].

578 The positive association between high HbA1c levels and combination therapy is consistent with  
579 recommendations, particularly the consensus report from the ADA and EASD [4], which advocates  
580 for considering initial combination therapy in individuals with elevated HbA1c at diagnosis.  
581 Additionally, the tendency to avoid combination therapy in individuals with a high number of  
582 comorbidities aligns with Ismail-Beigi *et al.* [63], who highlighted the importance of less intensive  
583 treatment for those with multiple or severe comorbidities.

584 While these findings are noteworthy, it is important to recognize the significant methodological  
585 limitations and weaknesses that affect their validity and reliability. There is a lack of clear definitions  
586 for the medications included in combination therapy and those used as the reference category for  
587 comparison. Many studies simply refer to “combination therapy” and “other antidiabetic drugs,”  
588 leading to ambiguity. Moreover, different reference categories were used for comparison with  
589 metformin or combination therapy. For instance, one study compared metformin alone or in  
590 combination with other antidiabetic medications that did not include metformin [37], while another  
591 compared metformin alone to other antihyperglycemic agents, including metformin used in  
592 combination therapy [30]. Adding to it is the inconsistent definition of independent variables and the  
593 variation in their collection times across studies. These inconsistencies not only hinder comparisons  
594 between studies but also undermine the external validity of the findings, limiting their generalizability.

595 The lack of efforts to ensure the similarity of groups and to identify and address potential  
596 confounder factors brought possible bias. For example, Zhang *et al.* [14] divided their sample into  
597 individuals <65 years and ≥65 years and reported twenty-five statistically significant differences  
598 between the two groups in twenty-nine variables analysed. This aligns with the scientific literature  
599 that has shown that the prevalence of cardiovascular disease increases with age [64], CKD is more  
600 common among older individuals [65], and multimorbidity is also more prevalent in older adults,  
601 strongly associated with increased healthcare utilization and costs [66, 67]. This information, along  
602 with the quality assessment results, raises concerns about the internal validity of the studies and  
603 suggests a high risk of bias in the findings.

604 Despite these internal and external validity concerns, some observed clinical practices deviate  
605 from established guidelines and scientific literature. This misalignment highlights an urgent need to  
606 bridge the gap between clinical practice and evidence-based recommendations. Furthermore, more  
607 robust studies are essential, particularly those that emphasize external validation and minimize the  
608 risk of bias. These studies should facilitate direct comparisons across research, providing a more  
609 reliable basis for developing evidence-based recommendations grounded in high-quality data.

610

## 611 **Strengths and limitations**

612 As far as we know, this is the first systematic review to map all factors driving physicians to choose  
613 metformin or combination therapy as first-line treatment. This review offers an exhaustive overview  
614 of the scientific literature, as no time or language restrictions were imposed, and grey literature was  
615 also included. Furthermore, compared to Mahmoud *et al.* [68], who conducted a meta-analysis of  
616 factors influencing antidiabetic drug prescribing for T2DM, including initiation therapy, this review  
617 expands the scope by incorporating nineteen additional studies.

618 All studies assessing the outcomes of interest were included, regardless of the reference group  
619 used for comparison. This approach allowed for a broad range of comparisons but also introduced  
620 heterogeneity into the analysis. Moreover, the weak evidence in the main findings due to the low  
621 quality of the studies, which integrated this systematic review, should not be overlooked.

622

## 623 **Conclusion**

624 This systematic review identified several factors associated with metformin and combination  
625 therapy as first-line therapies in T2DM, revealing clinical practices not aligned with evidence-based  
626 medicine. However, few studies have focused on combination therapy, assessing physician-related  
627 factors, and even fewer have compared metformin with newer drugs, such as SGLT2i. Additionally,  
628 the studies included in the review exhibited low certainty evidence. Therefore, a robust methodology  
629 is needed to bring scientific evidence. As a result, further research is required to address these

630 weaknesses and potential biases, provide stronger evidence, and ultimately support the findings  
631 reported in this review.

632

## 633 **Acknowledgements**

634 We would like to thank Mandy Ryan and Michael Abbott, who supervised MH at the Health  
635 Economics Research Unit at the University of Aberdeen, for their help in developing this study,  
636 which is integrated into her master's thesis.

637

638

639

640

641

642

643

644

645

646

647

648

649

650

651

652

653

654

## 655      **References:**

- 656      [1]      Galicia-Garcia U, Benito-Vicente A, Jebari S, et al. Pathophysiology of type 2 diabetes mellitus. *Int J*  
657                    *Mol Sci* 2020; 21: 1–34.
- 658      [2]      Sun H, Saeedi P, Karuranga S, et al. IDF Diabetes Atlas: Global, regional and country-level diabetes  
659                    prevalence estimates for 2021 and projections for 2045. *Diabetes Res Clin Pract* 2022; 183: 109119.
- 660      [3]      Saeedi P, Salpea P, Karuranga S, et al. Mortality attributable to diabetes in 20-79 years old adults, 2019  
661                    estimates: Results from the International Diabetes Federation Diabetes Atlas, 9th edition. *Diabetes Res*  
662                    *Clin Pract* 2020; 162: 108086.
- 663      [4]      Davies MJ, Aroda VR, Collins BS, et al. Management of Hyperglycemia in Type 2 Diabetes, 2022. A  
664                    Consensus Report by the American Diabetes Association (ADA) and the European Association for  
665                    the Study of Diabetes (EASD). *Diabetes Care* 2022; 45: 2753–2786.
- 666      [5]      Engler C, Leo M, Pfeifer B, et al. Long-term trends in the prescription of antidiabetic drugs: real-world  
667                    evidence from the Diabetes Registry Tyrol 2012-2018. *BMJ open diabetes Res care*; 8. Epub ahead of print  
668                    September 2020. DOI: 10.1136/bmjdr-2020-001279.
- 669      [6]      American Diabetes Association Professional Practice Committee. 9. Pharmacologic Approaches to  
670                    Glycemic Treatment: Standards of Medical Care in Diabetes-2022. *Diabetes Care* 2022; 45: S125–S143.
- 671      [7]      (NICE) LNI for H and CE. Type 2 diabetes in adults: management. *NICE Guideline, No. 28*. DOI:  
672                    32023018.
- 673      [8]      Corallo AN, Croxford R, Goodman DC, et al. A systematic review of medical practice variation in  
674                    OECD countries. *Health Policy* 2014; 114: 5–14.
- 675      [9]      Birkmeyer JD, Reames BN, McCulloch P, et al. Understanding of regional variation in the use of  
676                    surgery. *Lancet (London, England)* 2013; 382: 1121–9.
- 677      [10]     Page MJ, McKenzie JE, Bossuyt PM, et al. The PRISMA 2020 statement: an updated guideline for  
678                    reporting systematic reviews. *BMJ* 2021; 372: n71.
- 679      [11]     Ouzzani M, Hammady H, Fedorowicz Z, et al. Rayyan—a web and mobile app for systematic reviews.  
680                    *Syst Rev* 2016; 5: 210.
- 681      [12]     Aromataris E, Munn Z (eds). *JBI Manual for Evidence Synthesis*. JBI. Epub ahead of print 2020. DOI:  
682                    10.46658/JBIMES-20-01.
- 683      [13]     Brouwer ES, West SL, Kluckman M, et al. Initial and subsequent therapy for newly diagnosed type 2  
684                    diabetes patients treated in primary care using data from a vendor-based electronic health record.  
685                    *Pharmacoepidemiol Drug Saf* 2012; 21: 920–928.
- 686      [14]     Zhang Q, Rajagopalan S, Marrett E, et al. Time to treatment initiation with oral antihyperglycaemic  
687                    therapy in US patients with newly diagnosed type 2 diabetes. *Diabetes, Obes Metab* 2012; 14: 149–154.
- 688      [15]     Sinclair AJ, Alexander CM, Davies MJ, et al. Factors associated with initiation of antihyperglycaemic  
689                    medication in UK patients with newly diagnosed type 2 diabetes. *BMC Endocr Disord* 2012; 12: 1–7.
- 690      [16]     Raebel MA, Xu S, Goodrich GK, et al. Initial Antihyperglycemic Drug Therapy Among 241 327 Adults  
691                    With Newly Identified Diabetes From 2005 Through 2010: A Surveillance, Prevention, and  
692                    Management of Diabetes Mellitus (SUPREME-DM) Study. *Ann Pharmacother* 2013; 47: 1280–1291.
- 693      [17]     Geier AS, Wellmann I, Wellmann J, et al. Patterns and determinants of new first-line  
694                    antihyperglycaemic drug use in patients with type 2 diabetes mellitus. *Diabetes Res Clin Pract* 2014; 106:  
695                    73–80.

- 696 [18] Wright AK. *Examining Drug Utilisation Patterns and Optimal Treatment Pathways of Antidiabetic Medications.*  
697 The University of Manchester,  
698 [https://pure.manchester.ac.uk/ws/portalfiles/portal/54566935/FULL\\_TEXT.PDF](https://pure.manchester.ac.uk/ws/portalfiles/portal/54566935/FULL_TEXT.PDF) (2014).
- 699 [19] Li Y. *Factors Associated with Initiation of Glucose-lowering Agents among Medicare Beneficiaries with Newly*  
700 *Diagnosed Type 2 Diabetes, 2007 – 2017.* University of Pittsburgh. Epub ahead of print 2019. DOI:  
701 10.1159/000382900.
- 702 [20] Carrillo Balam GG. *Glucose-lowering medication initiation in people with newly diagnosed type 2 diabetes in Scotland:*  
703 *A mixed-methods study.* The University of Edinburgh, <http://dx.doi.org/10.7488/era/869> (2020).
- 704 [21] Ouchi D, Giner-Soriano M, Vilaplana-Carnerero C, et al. Longitudinal treatment patterns in patients  
705 recently diagnosed with type 2 diabetes mellitus in Catalonia. *Diabetes Res Clin Pract* 2023; 202: 110777.
- 706 [22] Winkelmayr WC, Stedman MR, Pogantsch M, et al. Guideline-conformity of initiation with oral  
707 hypoglycemic treatment for patients with newly therapy-dependent type 2 diabetes mellitus in Austria.  
708 *Pharmacoepidemiol Drug Saf* 2011; 20: 57–65.
- 709 [23] Desai NR, Shrank WH, Fischer MA, et al. Patterns of medication initiation in newly diagnosed diabetes  
710 mellitus: Quality and cost implications. *Am J Med* 2012; 125: 302.e1-302.e7.
- 711 [24] Morita Y, Murayama H, Odawara M, et al. Treatment patterns of drug-naive patients with type 2  
712 diabetes mellitus: A retrospective cohort study using a Japanese hospital database. *Diabetol Metab Syndr*  
713 2019; 11: 1–10.
- 714 [25] Pinto D, Rodrigues AP, Nunes B. Initial Therapeutic Choices for Type 2 Diabetes in the Portuguese  
715 Sentinel Practice Network. *Acta Med Port* 2019; 32: 375–380.
- 716 [26] Juste AM, Menditto E, Orlando V, et al. Treatment patterns of diabetes in Italy: A population-based  
717 study. *Front Pharmacol* 2019; 10: 1–11.
- 718 [27] Moreno-Juste A, Poblador-Plou B, Aza-Pascual-Salcedo M, et al. Initial therapy, regimen change, and  
719 persistence in a spanish cohort of newly treated type 2 diabetes patients: A retrospective, observational  
720 study using real-world data. *Int J Environ Res Public Health*; 17. Epub ahead of print 2020. DOI:  
721 10.3390/ijerph17103742.
- 722 [28] Yabe D, Higashiyama H, Kadowaki T, et al. Real-world Observational Study on Patient Outcomes in  
723 Diabetes (RESPOND): Study design and baseline characteristics of patients with type 2 diabetes newly  
724 initiating oral antidiabetic drug monotherapy in Japan. *BMJ Open Diabetes Res Care* 2020; 8: 1–11.
- 725 [29] Wood SJ, Magliano DJ, Bell JS, et al. Pharmacological treatment initiation for type 2 diabetes in  
726 Australia: are the guidelines being followed? *Diabet Med* 2020; 37: 1367–1373.
- 727 [30] Campbell DJT, Campbell DB, Ogundeji Y, et al. First-line pharmacotherapy for incident type 2  
728 diabetes: Prescription patterns, adherence and associated costs. *Diabet Med*; 38. Epub ahead of print  
729 2021. DOI: 10.1111/dme.14622.
- 730 [31] Shin HJ, Schneeweiss S, Glynn RJ, et al. Trends in First-Line Glucose-Lowering Drug Use in Adults  
731 With Type 2 Diabetes in Light of Emerging Evidence for SGLT-2i and GLP-1RA. *Diabetes Care* 2021;  
732 44: 1774–1782.
- 733 [32] Bonora E, Cataudella S, Marchesini G, et al. Initial treatment of diabetes in Italy. A nationwide  
734 population-based study from of the ARNO Diabetes Observatory. *Nutr Metab Cardiovasc Dis* 2021; 31:  
735 2661–2668.
- 736 [33] Barth SD, Kostev K, Krensel M, et al. Do Glucagonlike Peptide-1 Receptor Agonist and Sodium-

- 737 glucose Co-transporter 2 Inhibitor Prescriptions in Germany Reflect Recommendations for Type 2  
738 Diabetes with Cardiovascular Disease of the ADA/EASD Consensus Report? *Exp Clin Endocrinol*  
739 *Diabetes*. Epub ahead of print 2022. DOI: 10.1055/a-1927-4454.
- 740 [34] Grimes RT, Bennett K, Tilson L, et al. Initial therapy, persistence and regimen change in a cohort of  
741 newly treated type 2 diabetes patients. *Br J Clin Pharmacol* 2014; 79: 1000–1009.
- 742 [35] Bouchi R, Sugiyama T, Goto A, et al. Retrospective nationwide study on the trends in first-line  
743 antidiabetic medication for patients with type 2 diabetes in Japan. *J Diabetes Investig* 2022; 13: 280–291.
- 744 [36] Abdelmonem AS, Eurich DT, Gamble JM, et al. Use patterns of antidiabetic regimens by patients with  
745 type2 diabetes. *Can J Diabetes* 2013; 37: 394–400.
- 746 [37] Wang T-Y, Egualé T, Tamblyn R. Guidelines adherence in the treatment of patients with newly  
747 diagnosed type 2 diabetes: a historical cohort comparing the use of metformin in Quebec pre and post-  
748 Canadian Diabetes Association guidelines. *BMC Health Serv Res* 2013; 13: 442.
- 749 [38] Mitchell BD, Eby EL, Lage MJ. Glycemic control and the first use of oral antidiabetic agents among  
750 patients with type 2 diabetes mellitus. *Curr Med Res Opin* 2013; 29: 1587–1597.
- 751 [39] Vashisht R, Jung K, Shah N. Learning Effective Treatment Pathways for Type-2 Diabetes from a  
752 clinical data warehouse. *AMIA . Annu Symp proceedings AMIA Symp* 2016; 2016: 2036–2042.
- 753 [40] Fujihara K, Igarashi R, Matsunaga S, et al. Comparison of baseline characteristics and clinical course in  
754 Japanese patients with type 2 diabetes among whom different types of oral hypoglycemic agents were  
755 chosen by diabetes specialists as initial monotherapy (JDDM 42). *Medicine (Baltimore)* 2017; 96: e6122.
- 756 [41] Tanabe M, Motonaga R, Terawaki Y, et al. Prescription of oral hypoglycemic agents for patients with  
757 type 2 diabetes mellitus: A retrospective cohort study using a Japanese hospital database. *J Diabetes*  
758 *Investig* 2017; 8: 227–234.
- 759 [42] Liu CH, Chen ST, Chang CH, et al. Prescription trends and the selection of initial oral antidiabetic  
760 agents for patients with newly diagnosed type 2 diabetes: a nationwide study. *Public Health* 2017; 152:  
761 20–27.
- 762 [43] Hully, Stephen B Cummings, Steven R Browner WS, Grady DG, Newman TB. *Designing Clinical*  
763 *Research*. 2013. Epub ahead of print 2013. DOI: 10.1201/9781003039648-ch2.
- 764 [44] Centers for Medicare & Medicaid Services. What's Medicare?, <https://www.medicare.gov/> (accessed  
765 7 December 2024).
- 766 [45] Wang X, Cao Y, Wu Y, et al. The prescription pattern of initial treatment for type 2 diabetes in Beijing  
767 from 2011 to 2015. *Medicine (Baltimore)* 2019; 98: e14370.
- 768 [46] Canadian Diabetes Association Clinical Practice Guidelines Expert Committee, Cheng AYY. Diabetes  
769 Canada 2018 Clinical Practice Guidelines for the Prevention and Management of Diabetes in Canada.  
770 *Can J diabetes* 2018; 42 (Suppl: S1–S325).
- 771 [47] Araki E, Goto A, Kondo T, et al. Japanese Clinical Practice Guideline for Diabetes 2019. *J Diabetes*  
772 *Investig* 2020; 11: 1020–1076.
- 773 [48] Marx N, Federici M, Schütt K, et al. 2023 ESC Guidelines for the management of cardiovascular  
774 disease in patients with diabetes. *Eur Heart J* 2023; 44: 4043–4140.
- 775 [49] Bashier A, Bin Hussain A, Abdelgadir E, et al. Consensus recommendations for management of  
776 patients with type 2 diabetes mellitus and cardiovascular diseases. *Diabetol Metab Syndr* 2019; 11: 80.
- 777 [50] Allyhiani M, Kurdi A, Abdulaziz A, et al. Prescribing patterns of antidiabetics in type 2 diabetes and



- 778 factors affecting them. *Saudi Pharm J* 2022; 30: 112–119.
- 779 [51] Halm EA, Atlas SJ, Borowsky LH, et al. Understanding physician adherence with a pneumonia practice  
780 guideline: effects of patient, system, and physician factors. *Arch Intern Med* 2000; 160: 98–104.
- 781 [52] Grustam A, Jovic Vranes A, Soldatovic I, et al. Factors Associated with Utilization of Primary and  
782 Specialist Healthcare Services by Elderly Cardiovascular Patients in the Republic of Serbia: A Cross-  
783 Sectional Study from the National Health Survey 2013. *Int J Environ Res Public Health*; 17. Epub ahead  
784 of print 10 April 2020. DOI: 10.3390/ijerph17072602.
- 785 [53] Qi M, Santos H, Pinheiro P, et al. Demographic and socioeconomic determinants of access to care: A  
786 subgroup disparity analysis using new equity-focused measurements. *PLoS One* 2023; 18: e0290692.
- 787 [54] Qiu Y, Li Q, Tang J, et al. Why physicians do not initiate dual therapy as recommended by AACE  
788 guidelines: A survey of clinicians in the United States. *Diabetes Res Clin Pract* 2015; 108: 456–465.
- 789 [55] Diabetes Prevention Program Research Group. Long-term safety, tolerability, and weight loss  
790 associated with metformin in the Diabetes Prevention Program Outcomes Study. *Diabetes Care* 2012;  
791 35: 731–7.
- 792 [56] Lv Z, Guo Y. Metformin and Its Benefits for Various Diseases. *Front Endocrinol (Lausanne)* 2020; 11:  
793 191.
- 794 [57] Confederat L, Constantin S, Lupaşcu F, et al. HYPOGLYCEMIA INDUCED BY ANTIDIABETIC  
795 SULFONYLUREAS. *Rev Med Chir Soc Med Nat Iasi* 2015; 119: 579–84.
- 796 [58] Direção-Geral da Saúde. Abordagem Terapêutica Farmacológica na Diabetes Mellitus Tipo 2 no  
797 Adulto. *Norma da Direção-Geral da S nº 052/2011 atualizada a 27/04/2015* 2015; 1–28.
- 798 [59] Riddle MC. Modern Sulfonylureas: Dangerous or Wrongly Accused? *Diabetes Care* 2017; 40: 629–631.
- 799 [60] Hirst JA, Farmer AJ, Dyar A, et al. Estimating the effect of sulfonylurea on HbA1c in diabetes: a  
800 systematic review and meta-analysis. *Diabetologia* 2013; 56: 973–84.
- 801 [61] Nathan DM, Buse JB, Davidson MB, et al. Medical management of hyperglycaemia in type 2 diabetes  
802 mellitus: a consensus algorithm for the initiation and adjustment of therapy: a consensus statement  
803 from the American Diabetes Association and the European Association for the Study of Diabetes.  
804 *Diabetologia* 2009; 52: 17–30.
- 805 [62] Lalau J-D, Kajbaf F, Bennis Y, et al. Metformin Treatment in Patients With Type 2 Diabetes and  
806 Chronic Kidney Disease Stages 3A, 3B, or 4. *Diabetes Care* 2018; 41: 547–553.
- 807 [63] Ismail-Beigi F, Moghissi E, Tiktin M, et al. Individualizing glycemic targets in type 2 diabetes mellitus:  
808 implications of recent clinical trials. *Ann Intern Med* 2011; 154: 554–9.
- 809 [64] Writing Group Members, Mozaffarian D, Benjamin EJ, et al. Heart Disease and Stroke Statistics-2016  
810 Update: A Report From the American Heart Association. *Circulation* 2016; 133: e38-360.
- 811 [65] Kovesdy CP. Epidemiology of chronic kidney disease: an update 2022. *Kidney Int Suppl* 2022; 12: 7–11.
- 812 [66] Hazra NC, Rudisill C, Gulliford MC. Determinants of health care costs in the senior elderly: age,  
813 comorbidity, impairment, or proximity to death? *Eur J Health Econ* 2018; 19: 831–842.
- 814 [67] Rodrigues LP, de Oliveira Rezende AT, Delpino FM, et al. Association between multimorbidity and  
815 hospitalization in older adults: systematic review and meta-analysis. *Age Ageing*; 51. Epub ahead of print  
816 1 July 2022. DOI: 10.1093/ageing/afac155.
- 817 [68] Mahmoud F, Mullen A, Sainsbury C, et al. Meta-analysis of factors associated with antidiabetic drug  
818 prescribing for type 2 diabetes mellitus. *Eur J Clin Invest* 2023; 53: e13997.



819

## 820 **Supporting information**

821 **S1 Table:** Search query on the PubMed (Medline)

822 **S2 Table:** Search query on the Scopus.

823 **S3 Table:** Search on the Web of Science.

824

825

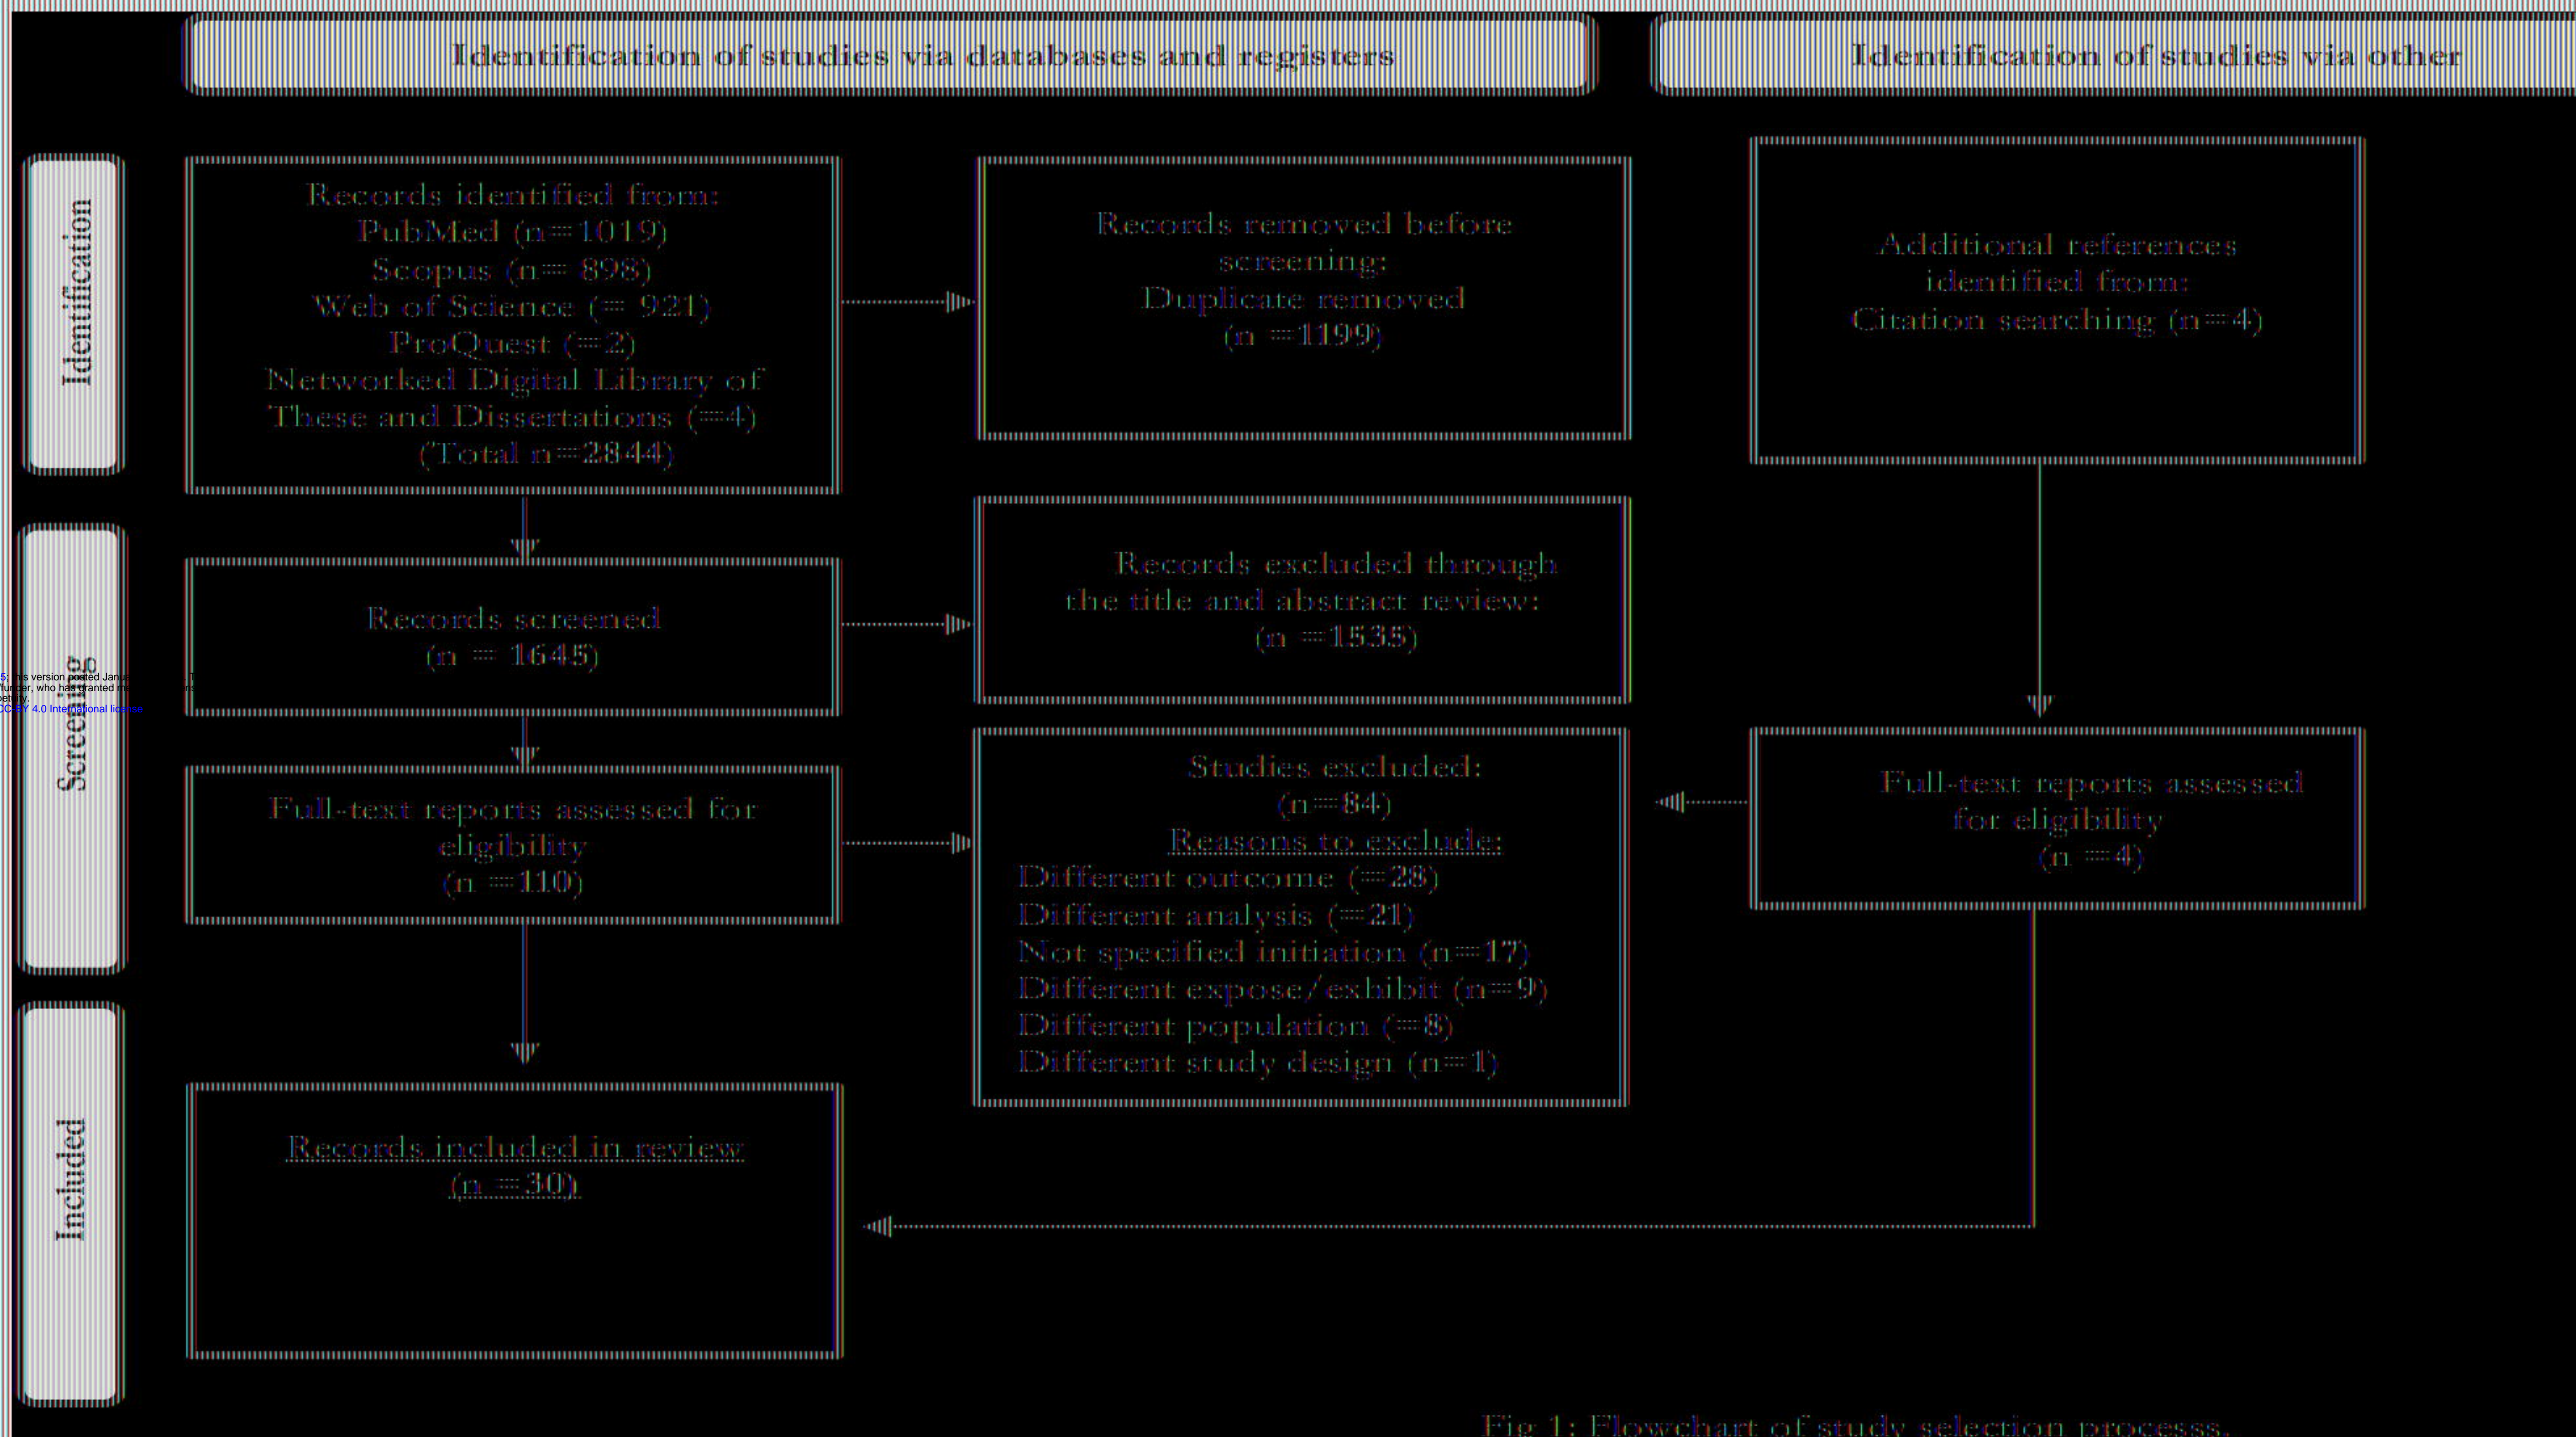

Fig 1: Flowchart of study selection process.
